# Supplementary material for: Impact of counter anions on spin-state switching of manganese(iii) complexes containing an azobenzene ligand
Source: Royal Society of Chemistry journal article supplement (doi:10.1039/d2dt00660j), 2022-01-01
Supplement: d2dt00660j1.pdf [file d2dt00660j1.pdf]

# Impact of Counter Anions on Spin-State Switching of Manganese(III) Complexes Containing Azobenzene Ligand

*Subrata Ghosh,<sup>a</sup> Sukanya Bagchi,<sup>a</sup> Sujit Kamilya,<sup>a</sup> Sakshi Mehta,<sup>a</sup> Debopam Sarkar,<sup>a</sup> Radovan Herchel<sup>b</sup> and Abhishake Mondal<sup>\*,a</sup>*

*<sup>a</sup>Solid State and Structural Chemistry Unit, Indian Institute of Science, Sir C V Raman Road, Bangalore 560012, India.*

*<sup>b</sup>Department of Inorganic Chemistry, Faculty of Science, Palacký University, CZ-771 46 Olomouc, Czech Republic.*

*\*Email: [mondal@iisc.ac.in](mailto:mondal@iisc.ac.in)*

## Table of Content:

|                                                                                                                                                                                                                                                                                                                                                                             |    |
|-----------------------------------------------------------------------------------------------------------------------------------------------------------------------------------------------------------------------------------------------------------------------------------------------------------------------------------------------------------------------------|----|
| Experimental Section.....                                                                                                                                                                                                                                                                                                                                                   | 5  |
| Materials and physical measurements.....                                                                                                                                                                                                                                                                                                                                    | 5  |
| Magnetic Measurements .....                                                                                                                                                                                                                                                                                                                                                 | 5  |
| X-ray crystallography .....                                                                                                                                                                                                                                                                                                                                                 | 6  |
| Scheme.....                                                                                                                                                                                                                                                                                                                                                                 | 8  |
| Figures .....                                                                                                                                                                                                                                                                                                                                                               | 8  |
| Tables.....                                                                                                                                                                                                                                                                                                                                                                 | 38 |
| References.....                                                                                                                                                                                                                                                                                                                                                             | 53 |
| <br>                                                                                                                                                                                                                                                                                                                                                                        |    |
| <b>Fig. S1.</b> Crystal images for complexes <b>1 – 4</b> (left to right).....                                                                                                                                                                                                                                                                                              | 8  |
| <b>Fig. S2.</b> Comparison of the room temperature experimental PXRD pattern and the 100 K simulated pattern for <b>1</b> .....                                                                                                                                                                                                                                             | 8  |
| <b>Fig. S3.</b> Comparison of the room temperature experimental PXRD pattern and the 100 K simulated pattern for <b>2</b> .....                                                                                                                                                                                                                                             | 9  |
| <b>Fig. S4.</b> Comparison of the room temperature experimental PXRD pattern and the 100 K simulated pattern for <b>3</b> .....                                                                                                                                                                                                                                             | 9  |
| <b>Fig. S5.</b> Comparison of the room temperature experimental PXRD pattern and the 100 K simulated pattern for <b>4</b> .....                                                                                                                                                                                                                                             | 10 |
| <b>Fig. S6.</b> TGA curves for <b>1 – 4</b> from 300 K to 573 K temperature range at 10 K min <sup>-1</sup> sweep rate under N <sub>2</sub> atmosphere.....                                                                                                                                                                                                                 | 10 |
| <b>Fig. S7.</b> ATR IR spectra of <b>1 – 4</b> at room temperature.....                                                                                                                                                                                                                                                                                                     | 11 |
| <b>Fig. S8.</b> Perspective view of complex <b>2</b> at 100 K. Hydrogen atoms are omitted for clarity (Mn: Purple, C: gray, N: blue, O: red, B: orange, F: light-green).....                                                                                                                                                                                                | 11 |
| <b>Fig. S9.</b> Top: Perspective view of complexes <b>3</b> (left) and <b>4</b> (right) at 100 K. Hydrogen atoms are omitted for clarity (Mn: Purple, C: gray, N: blue, O: red, F: light-green, P: brown, Cl: green); Bottom: Perspective view of complex <b>1(a)</b> , <b>2(b)</b> , <b>3(c)</b> and <b>4(d)</b> showing anisotropic displacement parameter at 100 K. .... | 12 |
| <b>Fig. S10.</b> Perspective view of the unit cell in <b>1</b> at 100 K. Hydrogen atoms are omitted for clarity (Mn: Purple, C: gray, N: blue, O: red, Cl: green). ....                                                                                                                                                                                                     | 13 |
| <b>Fig. S11.</b> Perspective view of the unit cell in <b>2</b> at 100 K. Hydrogen atoms are omitted for clarity (Mn: Purple, C: gray, N: blue, O: red, B: orange, F: light-green).....                                                                                                                                                                                      | 13 |
| <b>Fig. S12.</b> Perspective view of the unit cell in <b>3</b> at 100 K. Hydrogen atoms are omitted for clarity (Mn: Purple, C: gray, N: blue, O: red, Cl: green). ....                                                                                                                                                                                                     | 14 |
| <b>Fig. S13.</b> Perspective view of the unit cell in <b>4</b> at 100 K. Hydrogen atoms are omitted for clarity (Mn: Purple, C: gray, N: blue, O: red, P: brown, F: light-green).....                                                                                                                                                                                       | 14 |
| <b>Fig. S14.</b> Perspective view of the unit cell in <b>1</b> at 240 K. Hydrogen atoms are omitted for clarity (Mn: Purple, C: gray, N: blue, O: red, Cl: green). ....                                                                                                                                                                                                     | 15 |
| <b>Fig. S15.</b> View of N–H···Cl and C···Cl interactions (red lines) forming a 1D chain in <b>1</b> at 240 K.....                                                                                                                                                                                                                                                          | 15 |
| <b>Fig. S16.</b> View of N–H···F interactions (red lines) forming a 1D chain (a), formation of the 2D supramolecular structure via C–H···F interactions (red lines) (b), and view of $\pi \cdots \pi$ interactions (red lines) (c) in <b>2</b> at 100 K. ....                                                                                                               | 16 |

|                                                                                                                                                                                                                                                                                                                                                                    |    |
|--------------------------------------------------------------------------------------------------------------------------------------------------------------------------------------------------------------------------------------------------------------------------------------------------------------------------------------------------------------------|----|
| <b>Fig. S17.</b> Perspective view of supramolecular weak interactions among monocationic unit, counter anion, and solvent molecules (red lines) in <b>2</b> at 100 K. ....                                                                                                                                                                                         | 16 |
| <b>Fig. S18.</b> Perspective view of supramolecular weak interactions among monocationic unit, counter anion, and solvent molecules (red lines) in <b>3</b> at 100 K. ....                                                                                                                                                                                         | 17 |
| <b>Fig. S19.</b> View of C–H···F interactions (red lines) forming a 2D supramolecular chain (top), and C–H···F and $\pi \cdots \pi$ interactions (red lines) in the 1D chain (bottom) in <b>4</b> at 100 K. ....                                                                                                                                                   | 17 |
| <b>Fig. S20.</b> Hirshfeld surface analysis of complexes <b>2</b> and <b>3</b> , showing the $d_{\text{norm}}$ surfaces of the monocationic unit ([Mn(5azo-sal <sub>2</sub> -323)] <sup>+</sup> ) (top) and 2D fingerprint plots of all contacts: F···H (11.0%) for <b>2</b> (bottom, left) and O···H (11.5) for <b>3</b> (bottom, right) at 100 K. ....           | 18 |
| <b>Fig. S21.</b> Solid-state UV-vis-NIR spectra of <b>1</b> – <b>4</b> in KBr at room temperature (left: wavelength scale and right: wavenumber scale). ....                                                                                                                                                                                                       | 19 |
| <b>Fig. S22.</b> UV-vis-NIR spectra of <b>1</b> – <b>4</b> in MeCN with dilute (left) and concentrated (right) solutions at room temperature (top: wavelength scale and bottom: wavenumber scale). ....                                                                                                                                                            | 20 |
| <b>Fig. S23.</b> Field dependence of the magnetization as $M$ vs $H$ plots for <b>1</b> (Top, left), <b>2</b> (top, right), <b>3</b> (bottom, left), and <b>4</b> (bottom, right) at 100 K. The solid line is the best fit. ....                                                                                                                                   | 21 |
| <b>Fig. S24.</b> Temperature dependence of $\chi T$ product for <b>1</b> at 10000 Oe in cooling and heating mode. Left: in normal scale; Right: in log scale. ....                                                                                                                                                                                                 | 22 |
| <b>Fig. S25.</b> $\chi T$ vs. T data fit of <b>1</b> using the ideal solution model. ....                                                                                                                                                                                                                                                                          | 23 |
| <b>Fig. S26.</b> Temperature dependence of $\chi T$ product in log scale for <b>2</b> – <b>4</b> at 1000 Oe. ....                                                                                                                                                                                                                                                  | 23 |
| <b>Fig. S27.</b> Field dependence of the magnetization as $M$ vs $H$ (left) and $M$ vs $H/T$ (right) plots for <b>1</b> at 1.9, 5, 6, and 8 K. The solid lines are a guide for the eyes. ....                                                                                                                                                                      | 24 |
| <b>Fig. S28.</b> Field dependence of the magnetization as $M$ vs $H$ (left) and $M$ vs $H/T$ (right) plots for <b>2</b> at 1.9, 5, 6, and 8 K. The solid lines are a guide for the eyes. ....                                                                                                                                                                      | 24 |
| <b>Fig. S29.</b> Field dependence of the magnetization as $M$ vs $H$ (left) and $M$ vs $H/T$ (right) plots for <b>3</b> at 1.9, 5, 6, and 8 K. The solid lines are a guide for the eyes. ....                                                                                                                                                                      | 25 |
| <b>Fig. S30.</b> Field dependence of the magnetization as $M$ vs $H$ (left) and $M$ vs $H/T$ (right) plots for <b>4</b> at 1.9, 5, 6, and 8 K. The solid lines are a guide for the eyes. ....                                                                                                                                                                      | 25 |
| <b>Fig. S31.</b> Frequency vs temperature plot of the real ( $\chi'$ , left) and imaginary ( $\chi''$ , right) components of the ac susceptibility at 0 Oe external dc field and different temperatures from 1.9 – 15 K (top) and different external dc field at 1.9 K (bottom), respectively with a 3 Oe ac field for a polycrystalline sample of <b>1</b> . .... | 26 |
| <b>Fig. S32.</b> Frequency vs temperature plot of the real ( $\chi'$ , left) and imaginary ( $\chi''$ , right) components of the ac susceptibility at 0 Oe external dc field and different temperatures from 1.9 – 15 K (top) and different external dc field at 1.9 K (bottom), respectively with a 3 Oe ac field for a polycrystalline sample of <b>2</b> . .... | 27 |
| <b>Fig. S33.</b> Frequency vs temperature plot of the real ( $\chi'$ , left) and imaginary ( $\chi''$ , right) components of the ac susceptibility at 0 Oe external dc field and different temperatures from 1.9 – 15 K (top) and different external dc field at 1.9 K (bottom), respectively with a 3 Oe ac field for a polycrystalline sample of <b>3</b> . .... | 28 |
| <b>Fig. S34.</b> Frequency vs temperature plot of the real ( $\chi'$ , left) and imaginary ( $\chi''$ , right) components of the ac susceptibility at 0 Oe external dc field and different temperatures from 1.9 – 15 K (top) and different external dc field at 1.9 K (bottom), respectively with a 3 Oe ac field for a polycrystalline sample of <b>4</b> . .... | 29 |
| <b>Fig. S35.</b> Left: Temperature dependence of $\chi T$ product for <b>1</b> . Field dependence of the magnetization as $M$ vs $B$ plot of <b>1</b> at 1.9, 5, 6, and 8 K. The empty symbols – experimental data, full lines – calculated data with parameters in text. ....                                                                                     | 30 |
| <b>Fig. S36.</b> Left: Temperature dependence of $\chi T$ product for <b>2</b> . Field dependence of the magnetization as $M$ vs $B$ plot of <b>2</b> at 1.9, 5, 6, and 8 K. The empty symbols – experimental data, full lines – calculated data with parameters in text. ....                                                                                     | 30 |

|                                                                                                                                                                                                                                                                                |    |
|--------------------------------------------------------------------------------------------------------------------------------------------------------------------------------------------------------------------------------------------------------------------------------|----|
| <b>Fig. S37.</b> Left: Temperature dependence of $\chi T$ product for <b>3</b> . Field dependence of the magnetization as $M$ vs $B$ plot of <b>3</b> at 1.9, 5, 6, and 8 K. The empty symbols – experimental data, full lines – calculated data with parameters in text. .... | 31 |
| <b>Fig. S38.</b> Left: Temperature dependence of $\chi T$ product for <b>4</b> . Field dependence of the magnetization as $M$ vs $B$ plot of <b>4</b> at 1.9, 5, 6, and 8 K. The empty symbols – experimental data, full lines – calculated data with parameters in text. .... | 31 |
| <b>Fig. S39.</b> Cyclic voltammograms for reduction of <b>1 – 4</b> in 0.2 M ( $n$ Bu <sub>4</sub> N)PF <sub>6</sub> / MeCN with a scan rate of 100 mV s <sup>-1</sup> . Arrow indicates the open circuit potential with the direction of the potential sweep. ....            | 32 |
| <b>Fig. S40.</b> Cyclic voltammograms for reduction of <b>1 – 4</b> in 0.2 M ( $n$ Bu <sub>4</sub> N)PF <sub>6</sub> / MeCN with a scan rate of 100 mV s <sup>-1</sup> . Arrow indicates the open circuit potential with the direction of the potential sweep. ....            | 33 |
| <b>Fig. S41.</b> Cyclic voltammograms for reduction (left) and oxidation (right) of <b>1</b> in 0.2 M ( $n$ Bu <sub>4</sub> N)PF <sub>6</sub> / MeCN with different scan rate. Arrow indicates the open circuit potential with the direction of the potential sweep. ....      | 34 |
| <b>Fig. S42.</b> Cyclic voltammograms for reduction (left) and oxidation (right) of <b>2</b> in 0.2 M ( $n$ Bu <sub>4</sub> N)PF <sub>6</sub> / MeCN with different scan rate. Arrow indicates the open circuit potential with the direction of the potential sweep. ....      | 34 |
| <b>Fig. S43.</b> Cyclic voltammograms for reduction (left) and oxidation (right) of <b>3</b> in 0.2 M ( $n$ Bu <sub>4</sub> N)PF <sub>6</sub> / MeCN with different scan rate. Arrow indicates the open circuit potential with the direction of the potential sweep. ....      | 35 |
| <b>Fig. S44.</b> Square wave voltammograms for <b>1</b> in 0.2 M ( $n$ Bu <sub>4</sub> N)PF <sub>6</sub> / MeCN. Arrows indicate the open circuit potential with the direction of the potential sweep. ....                                                                    | 35 |
| <b>Fig. S45.</b> Square wave voltammograms for <b>2</b> in 0.2 M ( $n$ Bu <sub>4</sub> N)PF <sub>6</sub> / MeCN. Arrow indicates the open circuit potential with the direction of the potential sweep. ....                                                                    | 36 |
| <b>Fig. S46.</b> Square wave voltammogram for oxidation of <b>3</b> in 0.2 M ( $n$ Bu <sub>4</sub> N)PF <sub>6</sub> / MeCN. Arrow indicates the open circuit potential with the direction of the potential sweep. ....                                                        | 36 |
| <b>Fig. S47.</b> Square wave voltammogram for <b>4</b> in 0.2 M ( $n$ Bu <sub>4</sub> N)PF <sub>6</sub> / MeCN. Arrow indicates the open circuit potential with the direction of the potential sweep. ....                                                                     | 37 |
| <b>Table S1.</b> X-ray crystallography data for complexes <b>1 – 4</b> . ....                                                                                                                                                                                                  | 38 |
| <b>Table S2.</b> Selected bond distances (Å) and bond angles (°) in <b>1</b> . ....                                                                                                                                                                                            | 39 |
| <b>Table S3.</b> Selected bond distances (Å) and bond angles (°) in <b>2</b> and <b>3</b> at 100 K. ....                                                                                                                                                                       | 39 |
| <b>Table S4.</b> Selected bond distances (Å) and bond angles (°) in <b>4</b> at 100 K. ....                                                                                                                                                                                    | 40 |
| <b>Table S5:</b> CShM analysis data for complexes <b>1 – 4</b> . ....                                                                                                                                                                                                          | 40 |
| <b>Table S6:</b> Individual contributions to D-tensor for <b>1 - 4</b> calculated by CASSCF/NEVPT2. ....                                                                                                                                                                       | 42 |
| <b>Table S7:</b> The XYZ coordinates calculated by DFT. ....                                                                                                                                                                                                                   | 45 |
| <b>Table S8.</b> The structural parameters and energies for the low-spin (LS) and high-spin (HS) states for molecular geometries of <b>1</b> calculated by $\omega$ B97M-D4. ....                                                                                              | 52 |

## Experimental Section

### Materials and physical measurements

All manipulations were carried out under air unless otherwise stated. Solvents were dried by standard methods and freshly distilled before use. All chemicals were used as purchased from chemical sources without further purification. Azo-salicylaldehyde ligand (Scheme S1) was prepared according to the literature procedure.<sup>1</sup> The crystals of complexes were removed from the mother liquor and dried on filter paper to remove any adhering solvent molecules, before measurement. The elemental analyses of C, H, and N were performed with Thermo Scientific Flash 2000 Organic Elemental Analyzer. Infrared (IR) spectra were recorded in the range of 4000 – 500  $\text{cm}^{-1}$  on the Perkin Elmer spectrometer. UV-vis-NIR spectra were carried out in the region of 250 – 2000 nm on a Lambda 750 UV-vis-NIR spectrometer. The UV-vis spectroscopic measurements in solution were performed in quartz cuvettes with a path length of 1 cm. Solid-state measurements were carried out by taking a 5% sample by weight in KBr. Thermogravimetric analysis (TGA) was done on a Mettler Toledo TGA/SDTA851 analyzer with a heating rate of 10  $\text{K min}^{-1}$  under a nitrogen atmosphere ranging from 300 K to 573 K. Powder X-ray diffraction (PXRD) measurements were carried out on a PANalytical Empyrean diffractometer at 45 kV and 30 mA, under  $\text{Cu-K}\alpha$  radiation ( $\lambda = 1.54059 \text{ \AA}$ ). PXRD data analyses were done using PANalytical X'Pert HighScore Plus software.<sup>2</sup> Electrochemistry experiments were performed with a Metrohm Autolab PGSTAT101 using platinum as a working electrode in acetonitrile with 0.2 M ( $n\text{Bu}_4$ )NPF<sub>6</sub> as a supporting electrolyte. Ferrocene was used as an internal reference.

### Magnetic Measurements

The magnetic susceptibility measurements were carried out with Quantum Design MPMS-XL EverCool SQUID magnetometer, between 2 and 400 K for dc applied fields ranging from -5 T to 5 T for **1** - **4**. Polycrystalline samples of **1** - **4** (18.32, 21.68, 9.50, and 32.06 mg, respectively) were introduced in a polyethylene bag ( $2.8 \times 0.75 \times 0.02 \text{ cm}$ ) and were subjected to measurements. The

temperature-dependent data were measured using 1000 Oe and 10000 Oe dc fields. The isothermal magnetization data were acquired at 1.9, 5, 6, and 8 K. *M vs H* measurements were performed at 100 K to check for the presence of ferromagnetic or diamagnetic impurities which were found to be absent. The magnetic data were corrected for the sample holder and the diamagnetic contribution. The *ac* susceptibility measurements were measured with an oscillating *ac* field of 3 Oe with frequency between 1 to 1500 Hz.

### **X-ray crystallography**

Single-crystal X-ray structure diffraction studies of complexes **1** - **4** were performed with a Bruker SMART APEX CCD diffractometer equipped with graphite-monochromated Mo K $\alpha$  radiation ( $\lambda = 0.71073 \text{ \AA}$ ). The single crystal was mounted on a crystal mounting loop with the help of Paratone oil at 240 K and slowly cooled down to the measured temperature with a 2 K/min ramping rate using a liquid nitrogen gas-stream cooling device, followed by data collection at respective temperatures. Data integration and reduction were carried out using SAINT software, and empirical absorption corrections were performed using the SADABS program.<sup>3</sup> Structures were solved using direct methods and refined with a full-matrix least-squares method on  $F^2$  using SHELXL-2018 included in WinGX programs suite<sup>4</sup> and OLEX 2 version 1.3.0.<sup>5</sup> The packing diagrams were made using Mercury 4.2.0.<sup>6</sup> Complex **2** contains severely disordered one CH<sub>3</sub>CN molecule, which was treated by using SOLVENT MASK procedure in OLEX 2 which is equivalent to SQUEEZE in PLATON. Details of SOLVENT MASK procedure and corresponding results are provided in the respective CIF file.

All other non-hydrogen atoms of complexes **1** - **4** were refined anisotropically and hydrogen atoms were labeled to ideal positions and refined isotropically using a riding model. CCDC 2098342, 2098344, 2098402, 2098404, and 2098406 contain the supplementary crystallographic

data for this paper. These data can be obtained free of charge from The Cambridge Crystallographic Data Centre via [www.ccdc.cam.ac.uk/data\\_request/cif](http://www.ccdc.cam.ac.uk/data_request/cif).

## Scheme

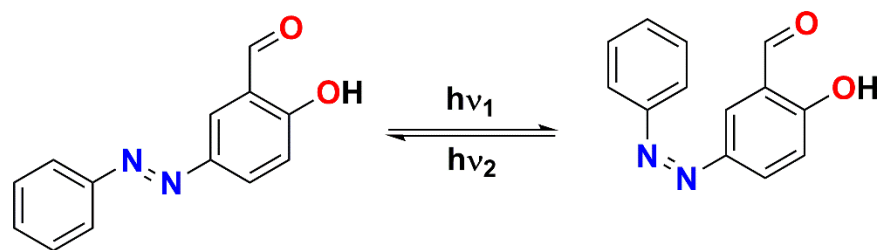

**Scheme S1.** Schematic presentation of photoisomerization of azo-salicylaldehyde.

## Figures

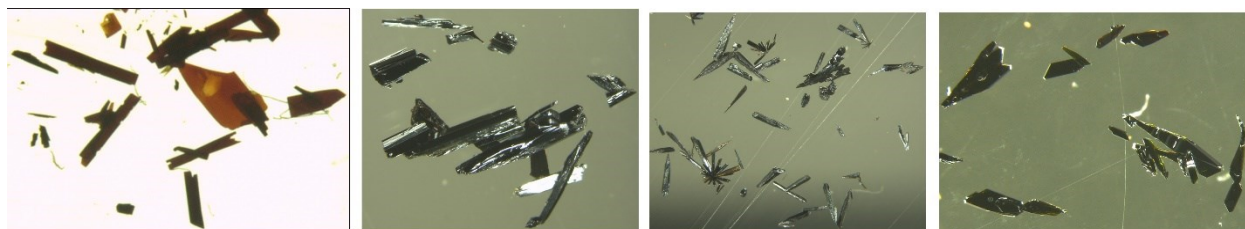

**Fig. S1.** Crystal images for complexes **1** – **4** (left to right).

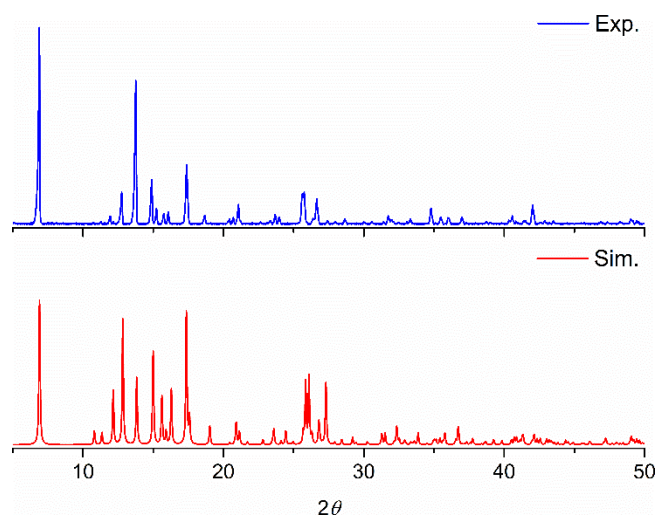

**Fig. S2.** Comparison of the room temperature experimental PXRD pattern and the 100 K simulated pattern for **1**.



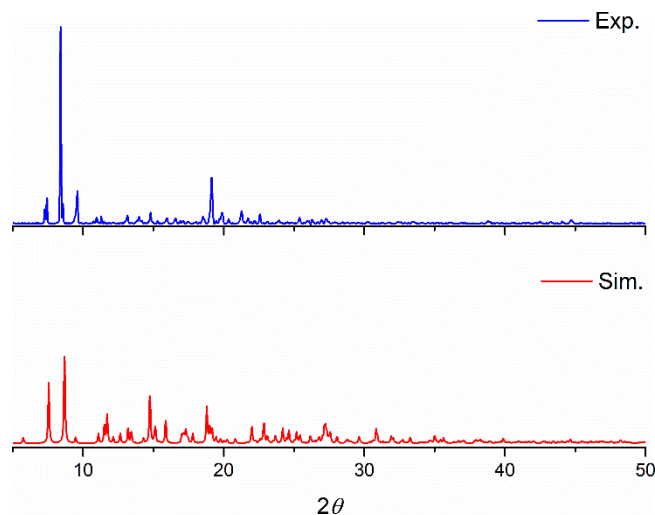

**Fig. S3.** Comparison of the room temperature experimental PXRD pattern and the 100 K simulated pattern for **2**.

The reason for the slight deviation in the experimental PXRD data for **2** is probably due to the partial solvent loss during the sample preparation for the PXRD measurement at room temperature.

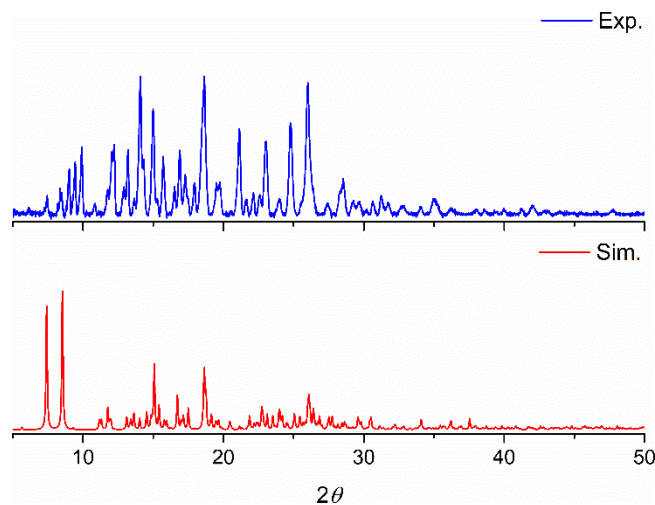

**Fig. S4.** Comparison of the room temperature experimental PXRD pattern and the 100 K simulated pattern for **3**.

The reason for the slight deviation in the experimental PXRD data for **3** is probably due to the partial solvent loss during the sample preparation for the PXRD measurement at room temperature.

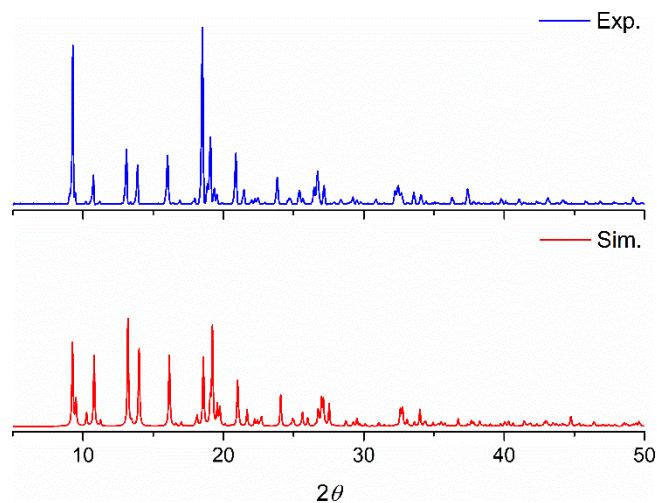

**Fig. S5.** Comparison of the room temperature experimental PXRD pattern and the 100 K simulated pattern for **4**.

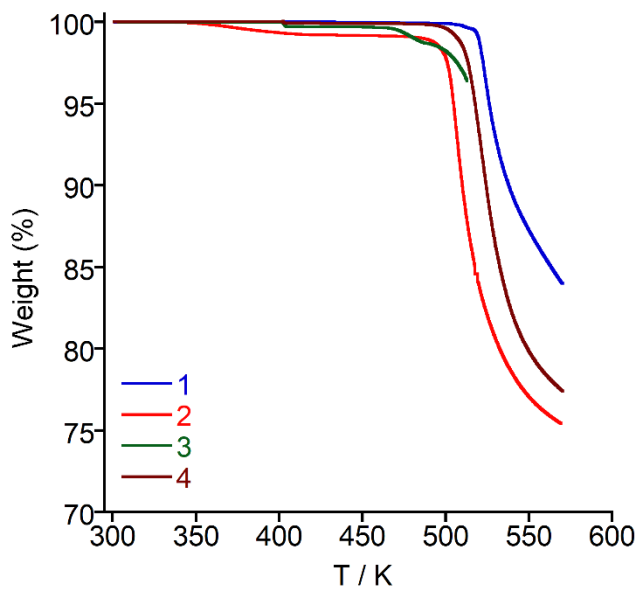

**Fig. S6.** TGA curves for **1** – **4** from 300 K to 573 K temperature range at 10 K min<sup>-1</sup> sweep rate under N<sub>2</sub> atmosphere.

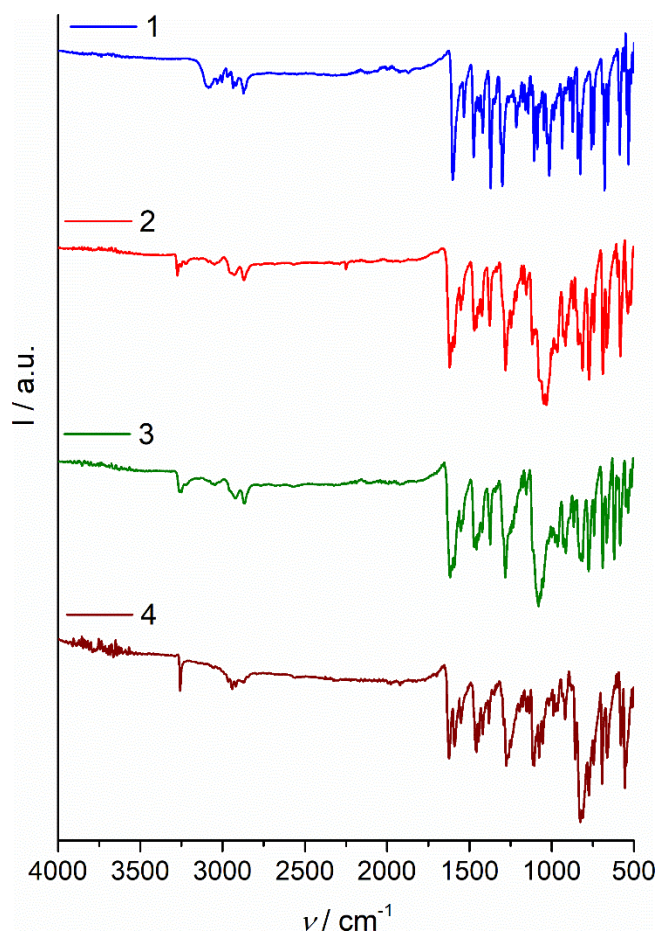

**Fig. S7.** ATR IR spectra of **1** – **4** at room temperature.

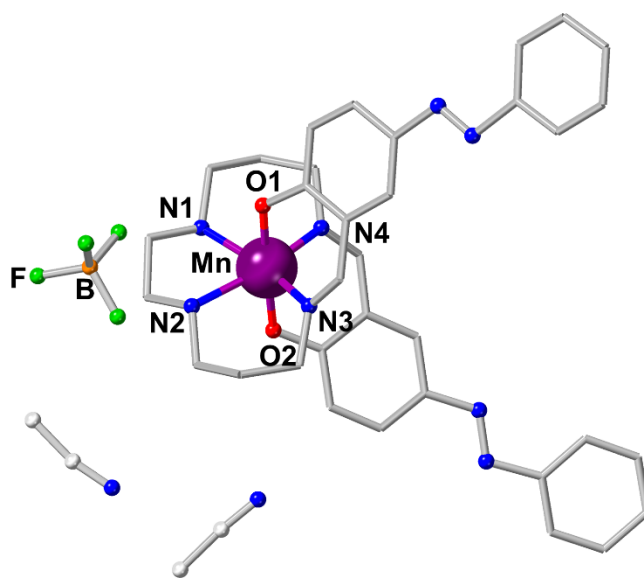

**Fig. S8.** Perspective view of complex **2** at 100 K. Hydrogen atoms are omitted for clarity (Mn: Purple, C: gray, N: blue, O: red, B: orange, F: light-green).

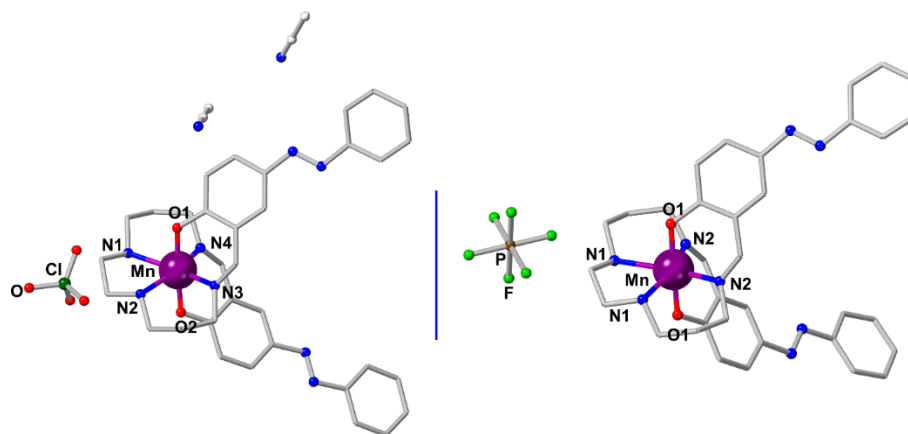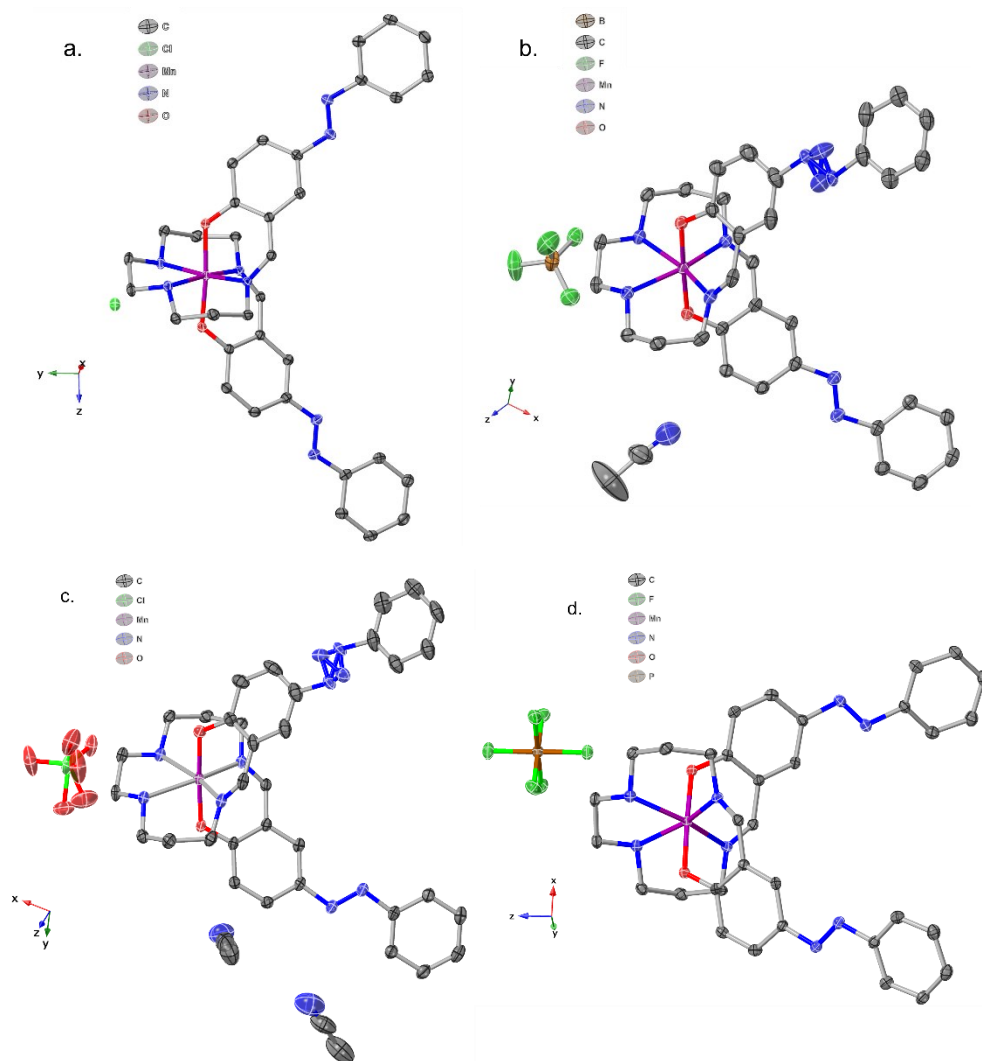

**Fig. S9.** Top: Perspective view of complexes **3** (left) and **4** (right) at 100 K. Hydrogen atoms are omitted for clarity (Mn: Purple, C: gray, N: blue, O: red, F: light-green, P: brown, Cl: green); Bottom: Perspective view of complex **1**(a), **2**(b), **3**(c) and **4**(d) showing anisotropic displacement parameter at 100 K.

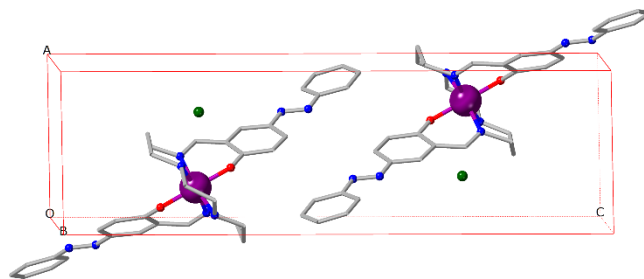

**Fig. S10.** Perspective view of the unit cell in **1** at 100 K. Hydrogen atoms are omitted for clarity (Mn: Purple, C: gray, N: blue, O: red, Cl: green).

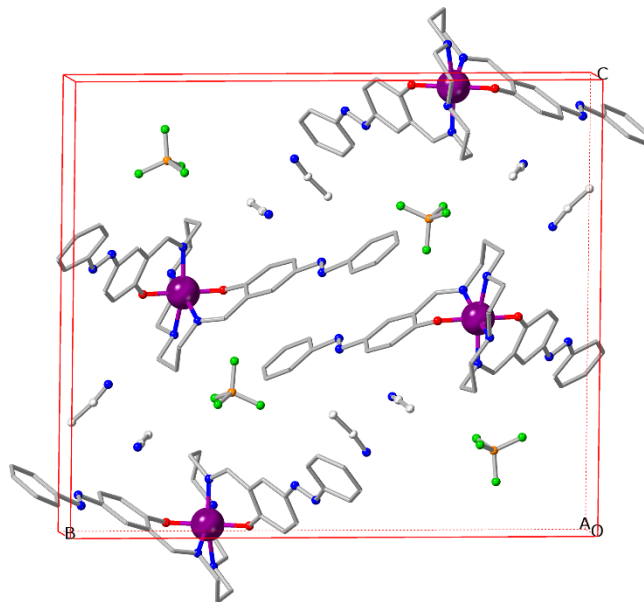

**Fig. S11.** Perspective view of the unit cell in **2** at 100 K. Hydrogen atoms are omitted for clarity (Mn: Purple, C: gray, N: blue, O: red, B: orange, F: light-green).

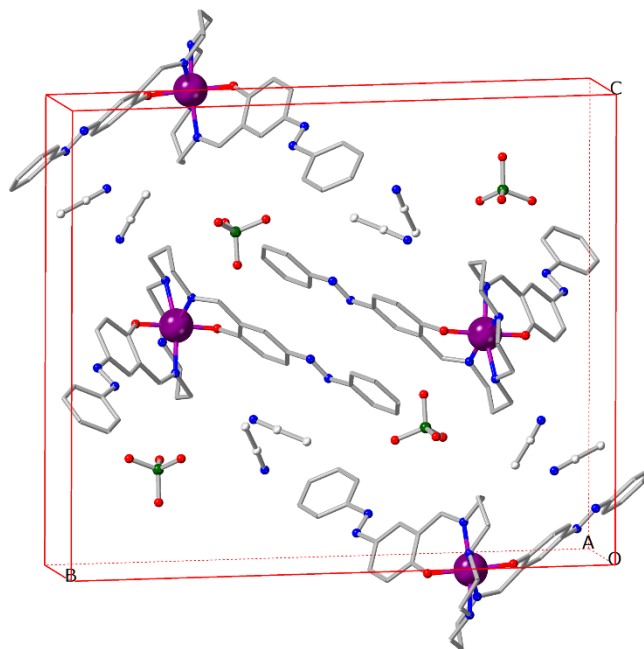

**Fig. S12.** Perspective view of the unit cell in **3** at 100 K. Hydrogen atoms are omitted for clarity (Mn: Purple, C: gray, N: blue, O: red, Cl: green).

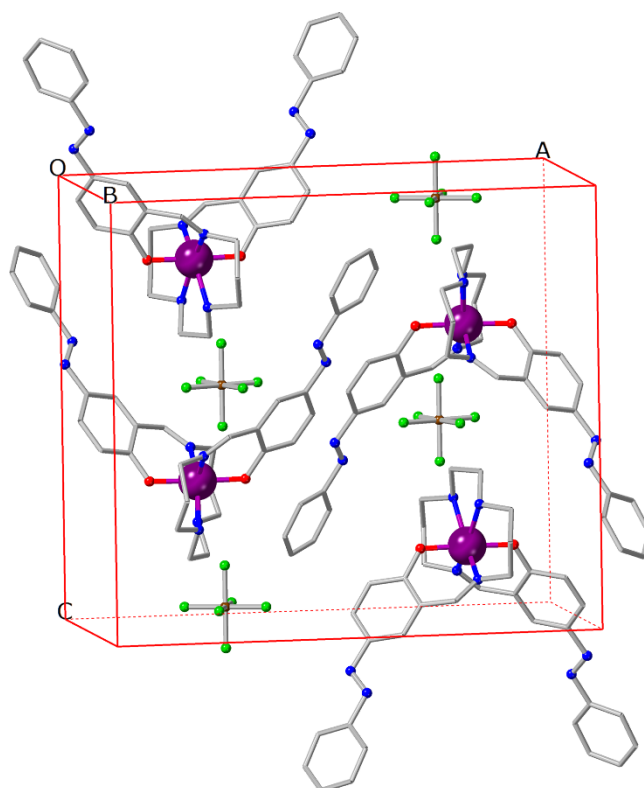

**Fig. S13.** Perspective view of the unit cell in **4** at 100 K. Hydrogen atoms are omitted for clarity (Mn: Purple, C: gray, N: blue, O: red, P: brown, F: light-green).

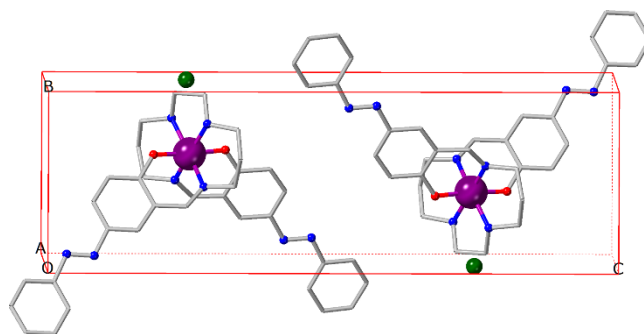

**Fig. S14.** Perspective view of the unit cell in **1** at 240 K. Hydrogen atoms are omitted for clarity (Mn: Purple, C: gray, N: blue, O: red, Cl: green).

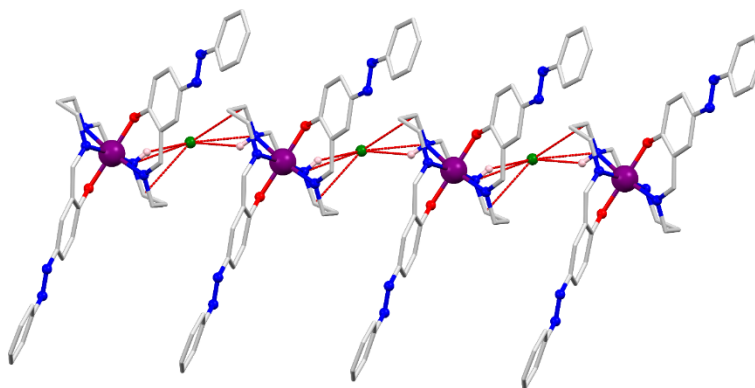

**Fig. S15.** View of N-H...Cl and C...Cl interactions (red lines) forming a 1D chain in **1** at 240 K

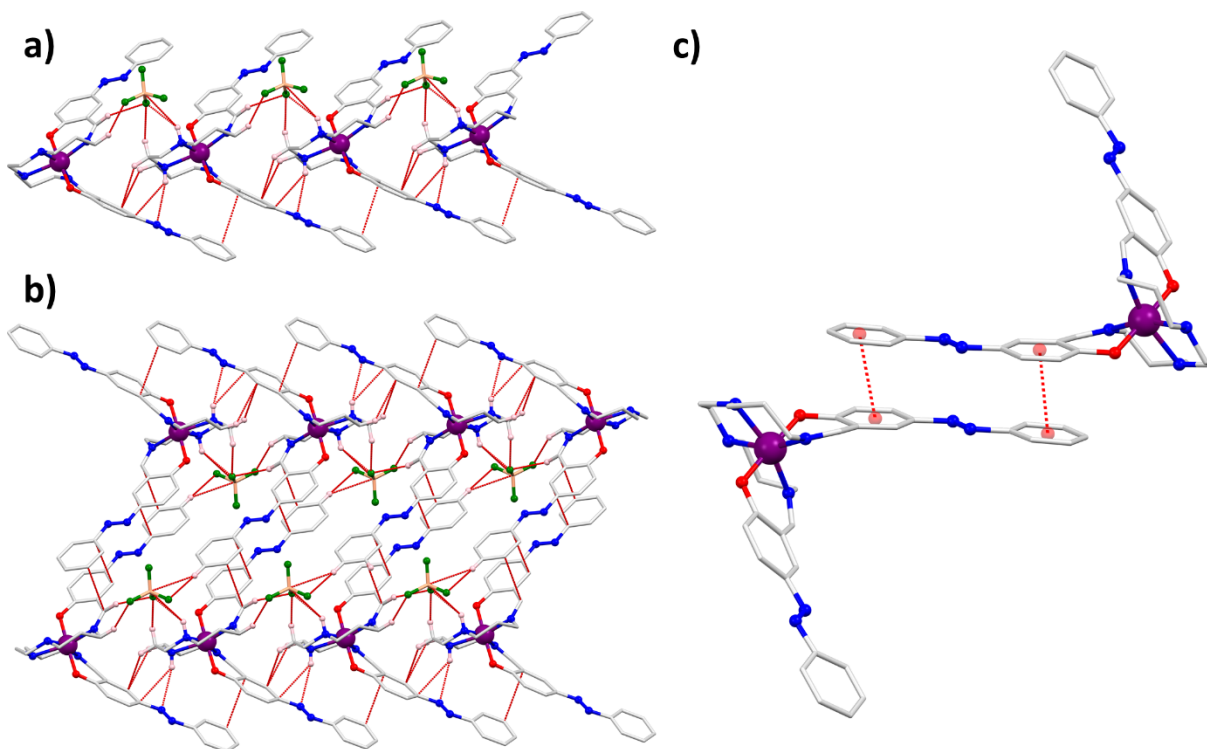

**Fig. S16.** View of N–H···F interactions (red lines) forming a 1D chain (a), formation of the 2D supramolecular structure via C–H···F interactions (red lines) (b), and view of  $\pi$ ··· $\pi$  interactions (red lines) (c) in **2** at 100 K.

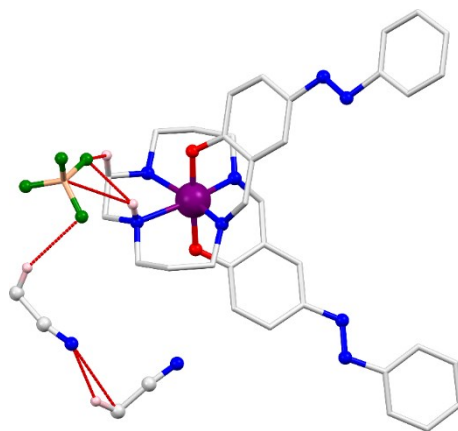

**Fig. S17.** Perspective view of supramolecular weak interactions among monocationic unit, counter anion, and solvent molecules (red lines) in **2** at 100 K.



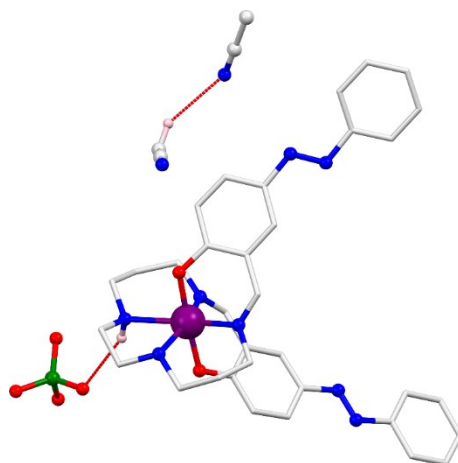

**Fig. S18.** Perspective view of supramolecular weak interactions among monocationic unit, counter anion, and solvent molecules (red lines) in **3** at 100 K.

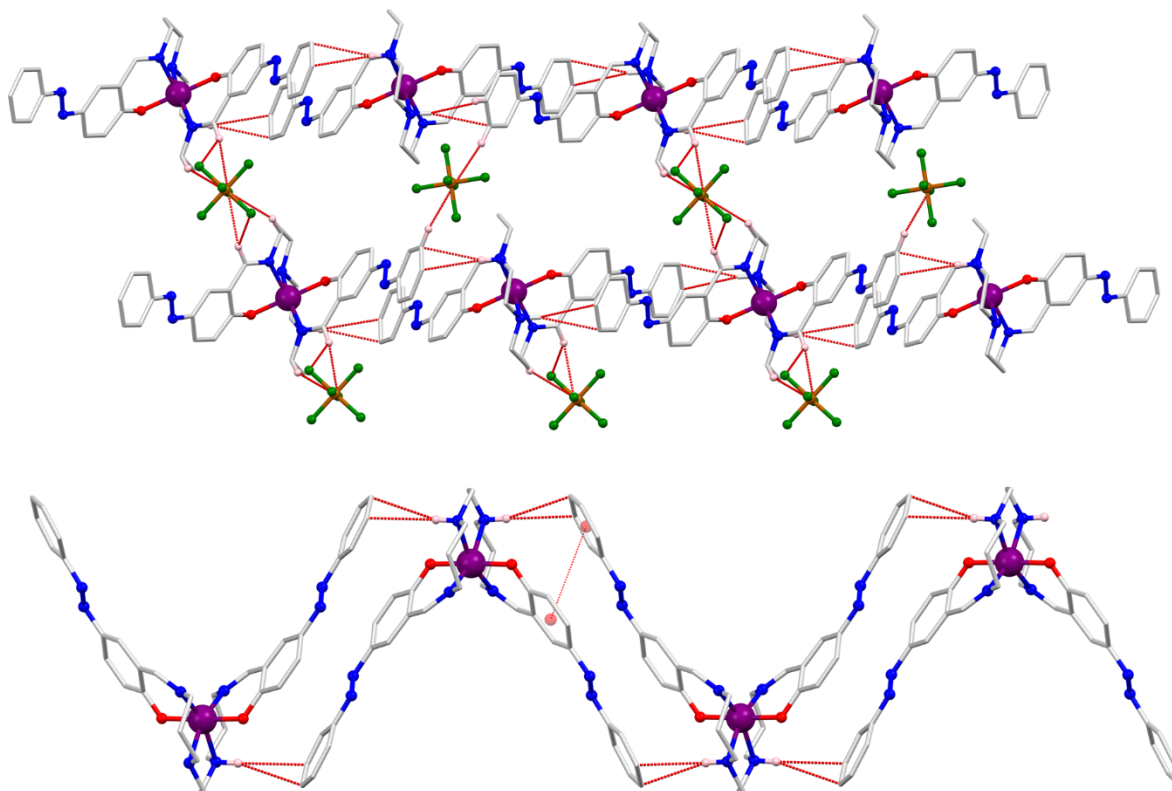

**Fig. S19.** View of C–H...F interactions (red lines) forming a 2D supramolecular chain (top), and C–H...F and  $\pi$ ... $\pi$  interactions (red lines) in the 1D chain (bottom) in **4** at 100 K.

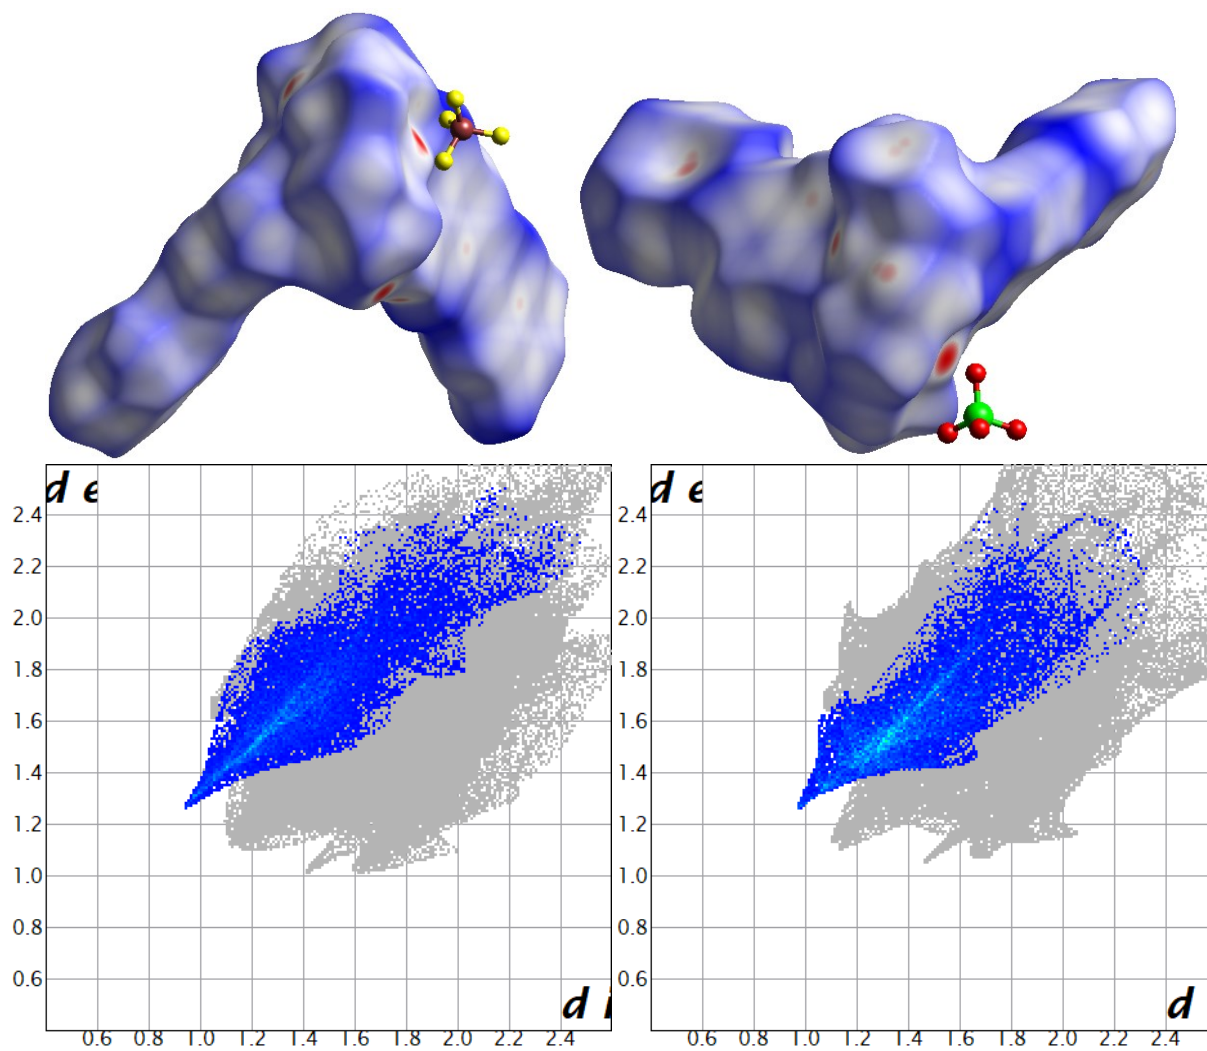

**Fig. S20.** Hirshfeld surface analysis of complexes **2** and **3**, showing the  $d_{\text{norm}}$  surfaces of the monocationic unit ( $[\text{Mn}(5\text{azo-sal}_2\text{-323})]^+$ ) (top) and 2D fingerprint plots of all contacts:  $\text{F}\cdots\text{H}$  (11.0%) for **2** (bottom, left) and  $\text{O}\cdots\text{H}$  (11.5) for **3** (bottom, right) at 100 K.

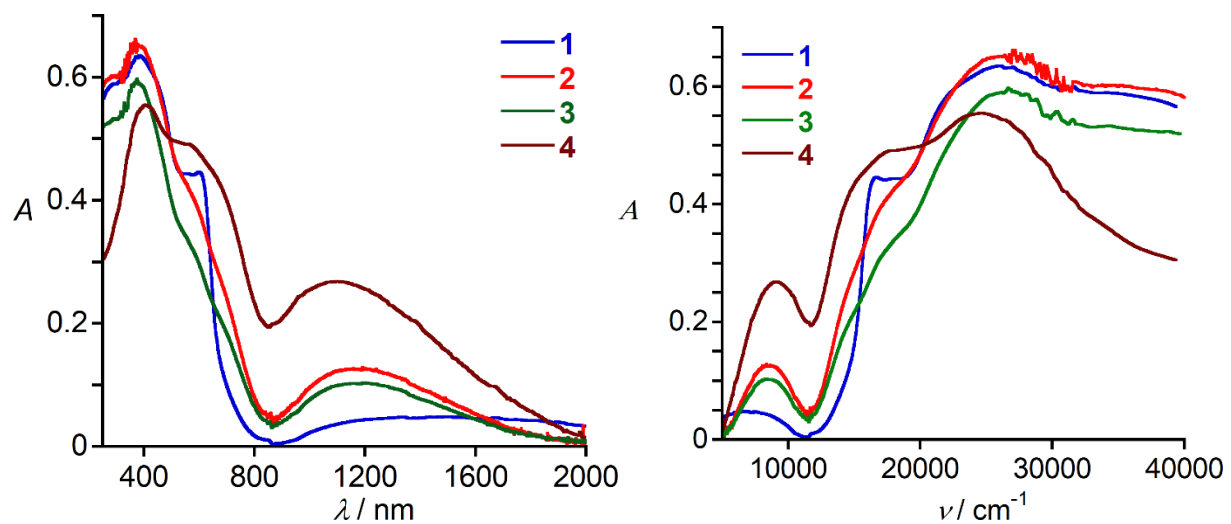

**Fig. S21.** Solid-state UV-vis-NIR spectra of **1** – **4** in KBr at room temperature (left: wavelength scale and right: wavenumber scale).

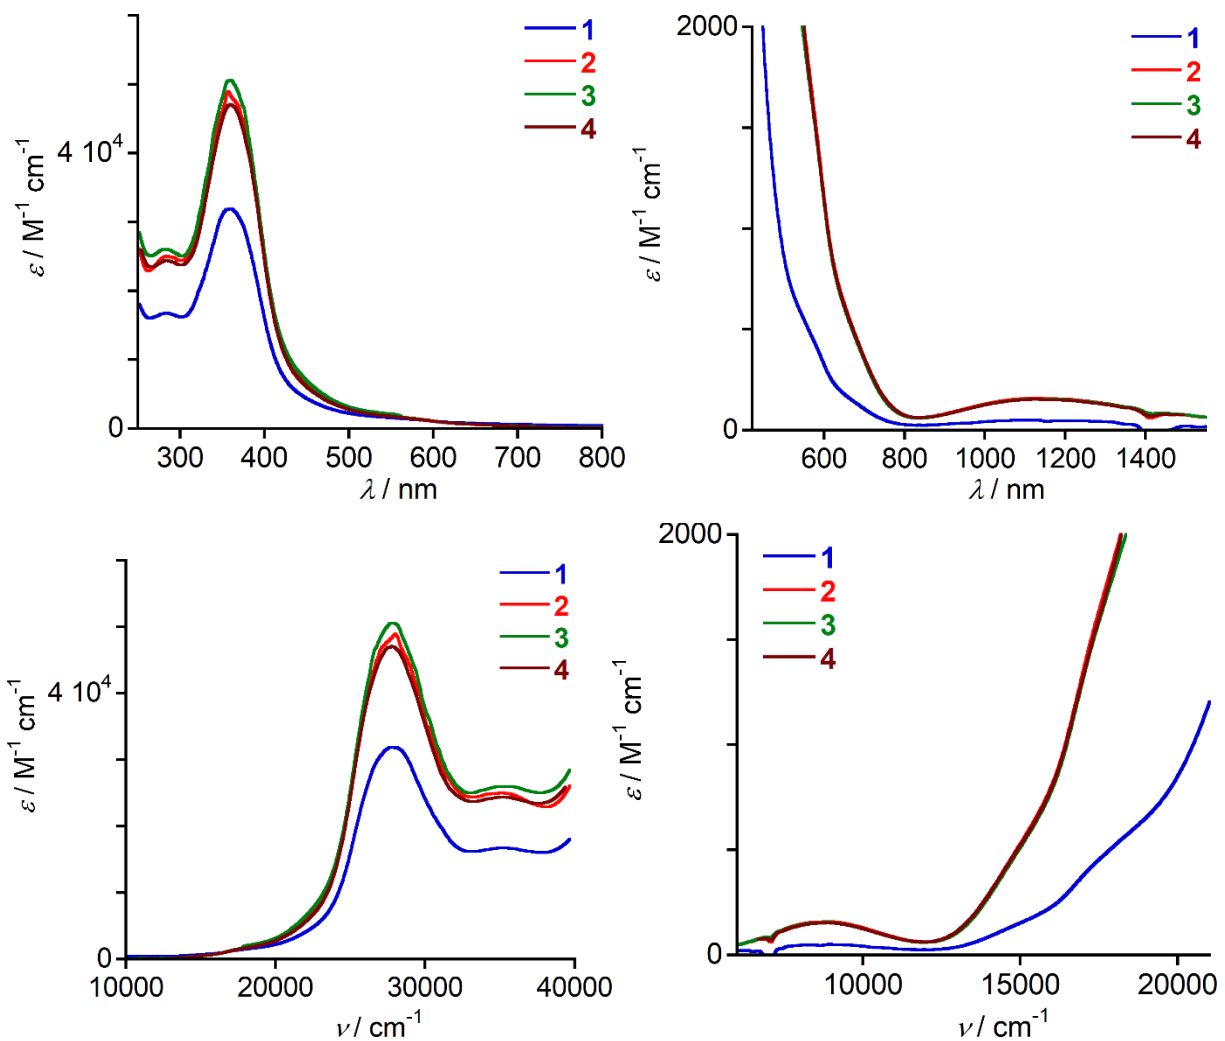

**Fig. S22.** UV-vis-NIR spectra of **1** – **4** in MeCN with dilute (left) and concentrated (right) solutions at room temperature (top: wavelength scale and bottom: wavenumber scale).

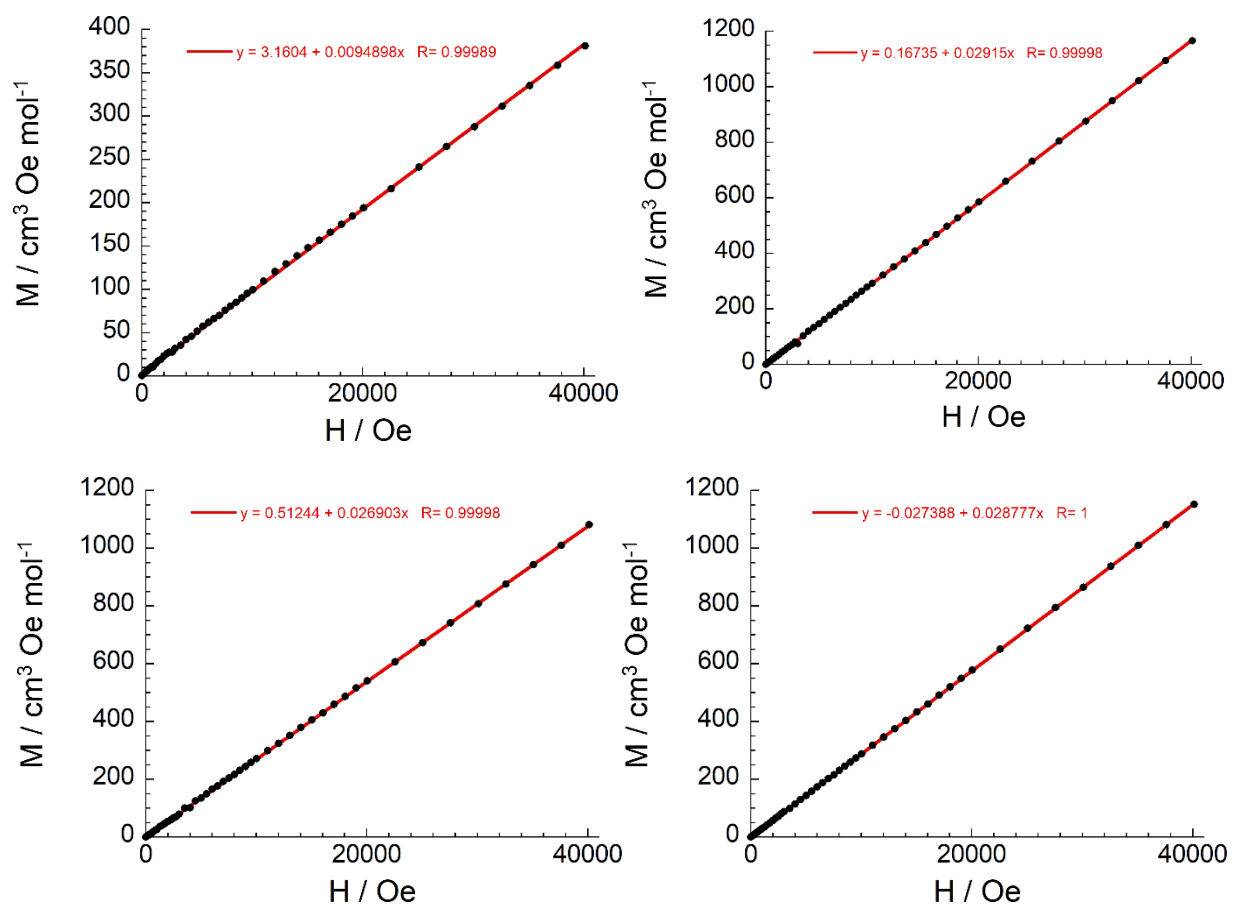

**Fig. S23.** Field dependence of the magnetization as  $M$  vs  $H$  plots for **1** (Top, left), **2** (top, right), **3** (bottom, left), and **4** (bottom, right) at 100 K. The solid line is the best fit.

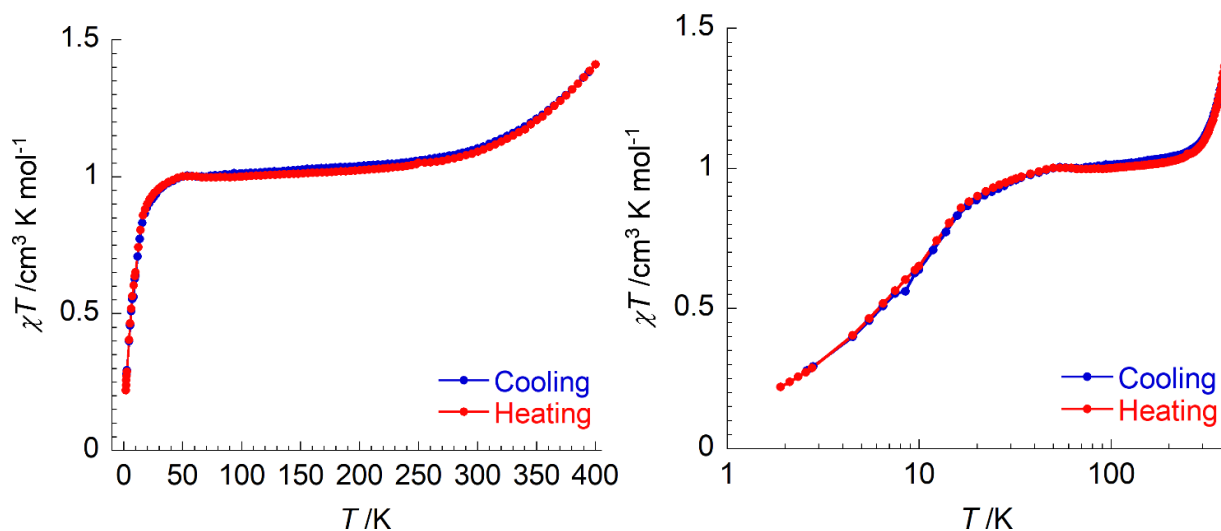

**Fig. S24.** Temperature dependence of  $\chi T$  product for **1** at 10000 Oe in cooling and heating mode. Left: in normal scale; Right: in log scale.

The following equation deduced from the ideal solution model was applied to fit the spin crossover properties observed by magnetic studies.

$$X = X_{LS} + \frac{X_{HS} - X_{LS}}{1 + \exp [\Delta H/R (1/T - 1/T_{1/2})]}$$

$X = \chi T$  product

$X_{LS} = \chi T$  product for pure low-spin

$X_{HS} = \chi T$  product for pure high-spin

$\Delta H$  = Enthalpy change associated with the spin crossover phenomenon

$R$  = Ideal gas constant

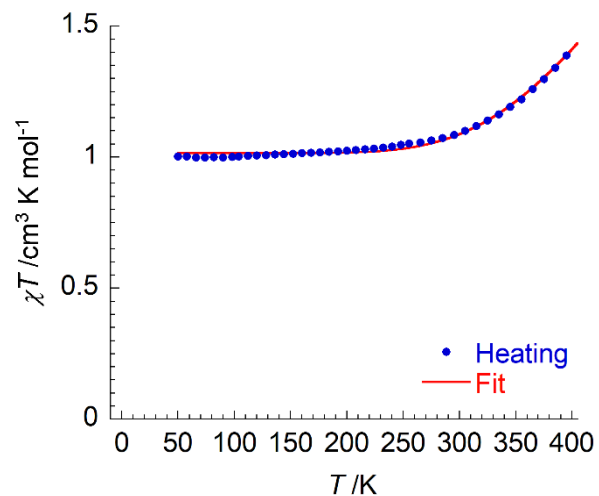

**Fig. S25.**  $\chi T$  vs.  $T$  data fit of **1** using the ideal solution model.

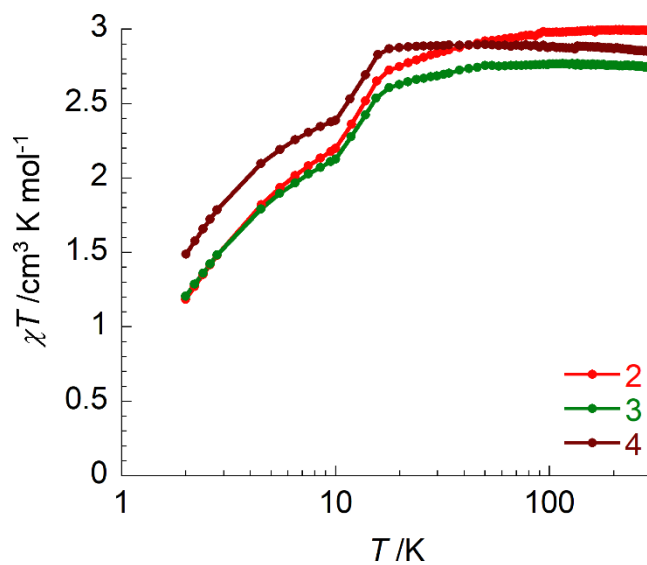

**Fig. S26.** Temperature dependence of  $\chi T$  product in log scale for **2** – **4** at 1000 Oe.

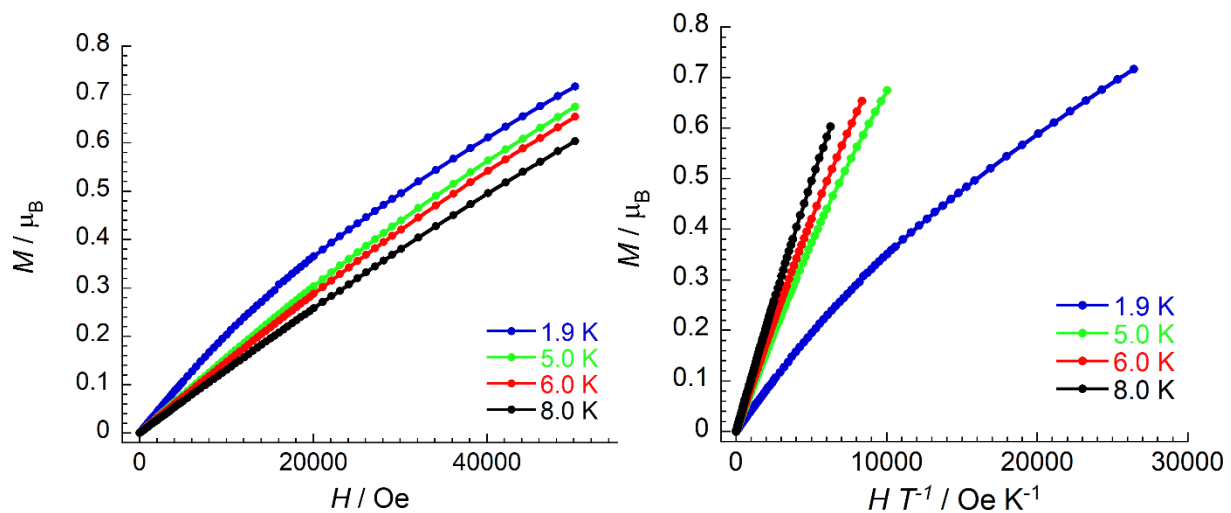

**Fig. S27.** Field dependence of the magnetization as  $M$  vs  $H$  (left) and  $M$  vs  $H/T$  (right) plots for **1** at 1.9, 5, 6, and 8 K. The solid lines are a guide for the eyes.

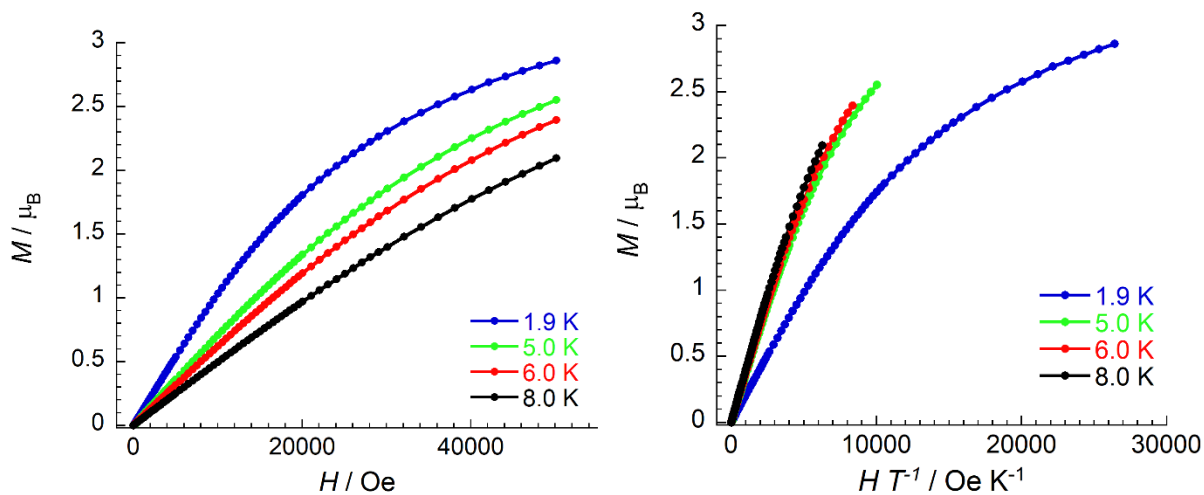

**Fig. S28.** Field dependence of the magnetization as  $M$  vs  $H$  (left) and  $M$  vs  $H/T$  (right) plots for **2** at 1.9, 5, 6, and 8 K. The solid lines are a guide for the eyes.



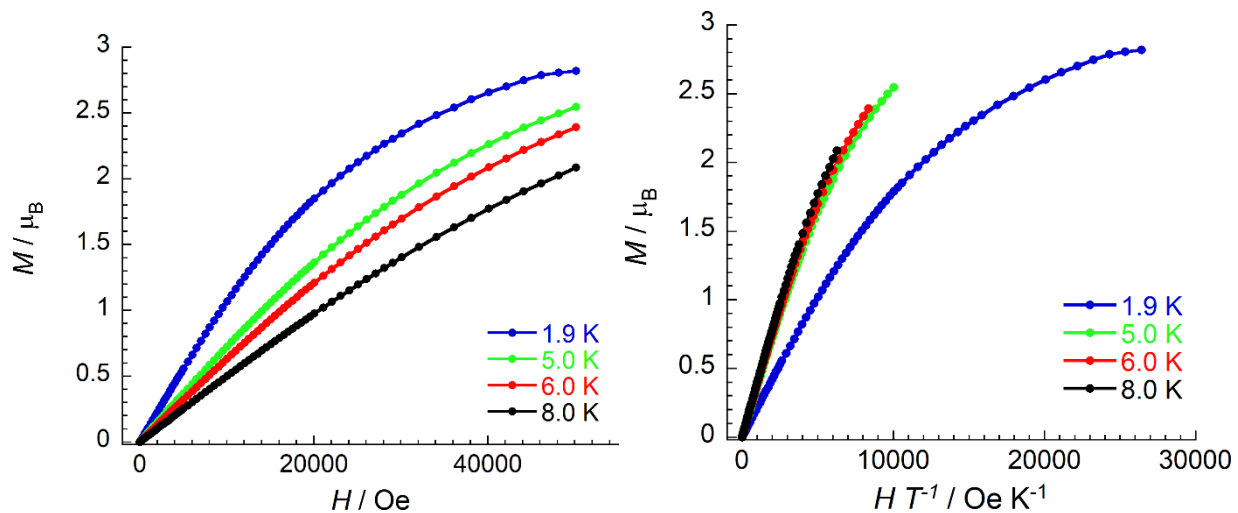

**Fig. S29.** Field dependence of the magnetization as  $M$  vs  $H$  (left) and  $M$  vs  $H/T$  (right) plots for **3** at 1.9, 5, 6, and 8 K. The solid lines are a guide for the eyes.

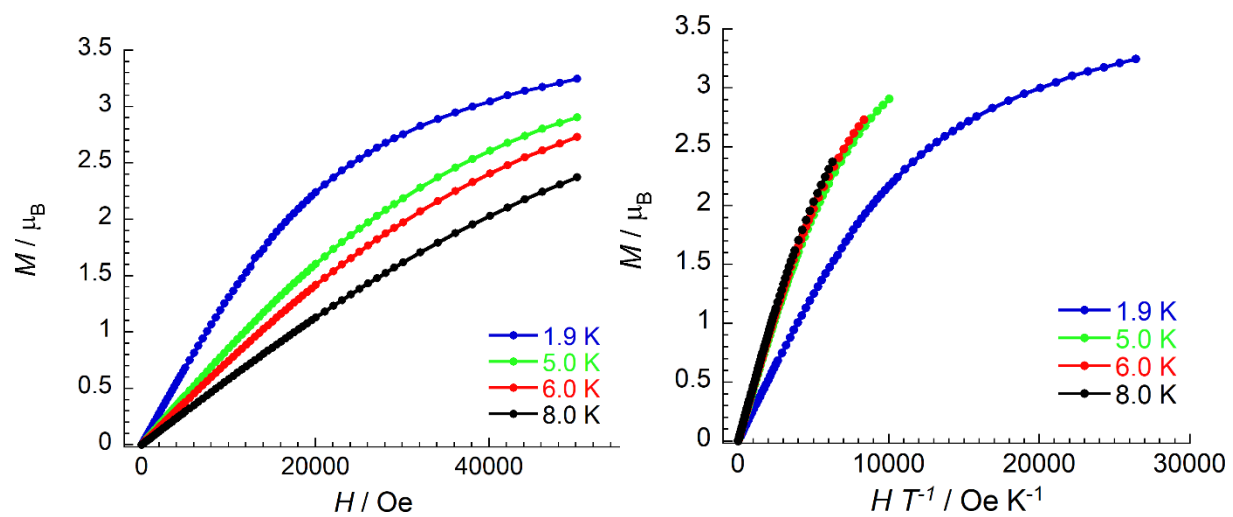

**Fig. S30.** Field dependence of the magnetization as  $M$  vs  $H$  (left) and  $M$  vs  $H/T$  (right) plots for **4** at 1.9, 5, 6, and 8 K. The solid lines are a guide for the eyes.

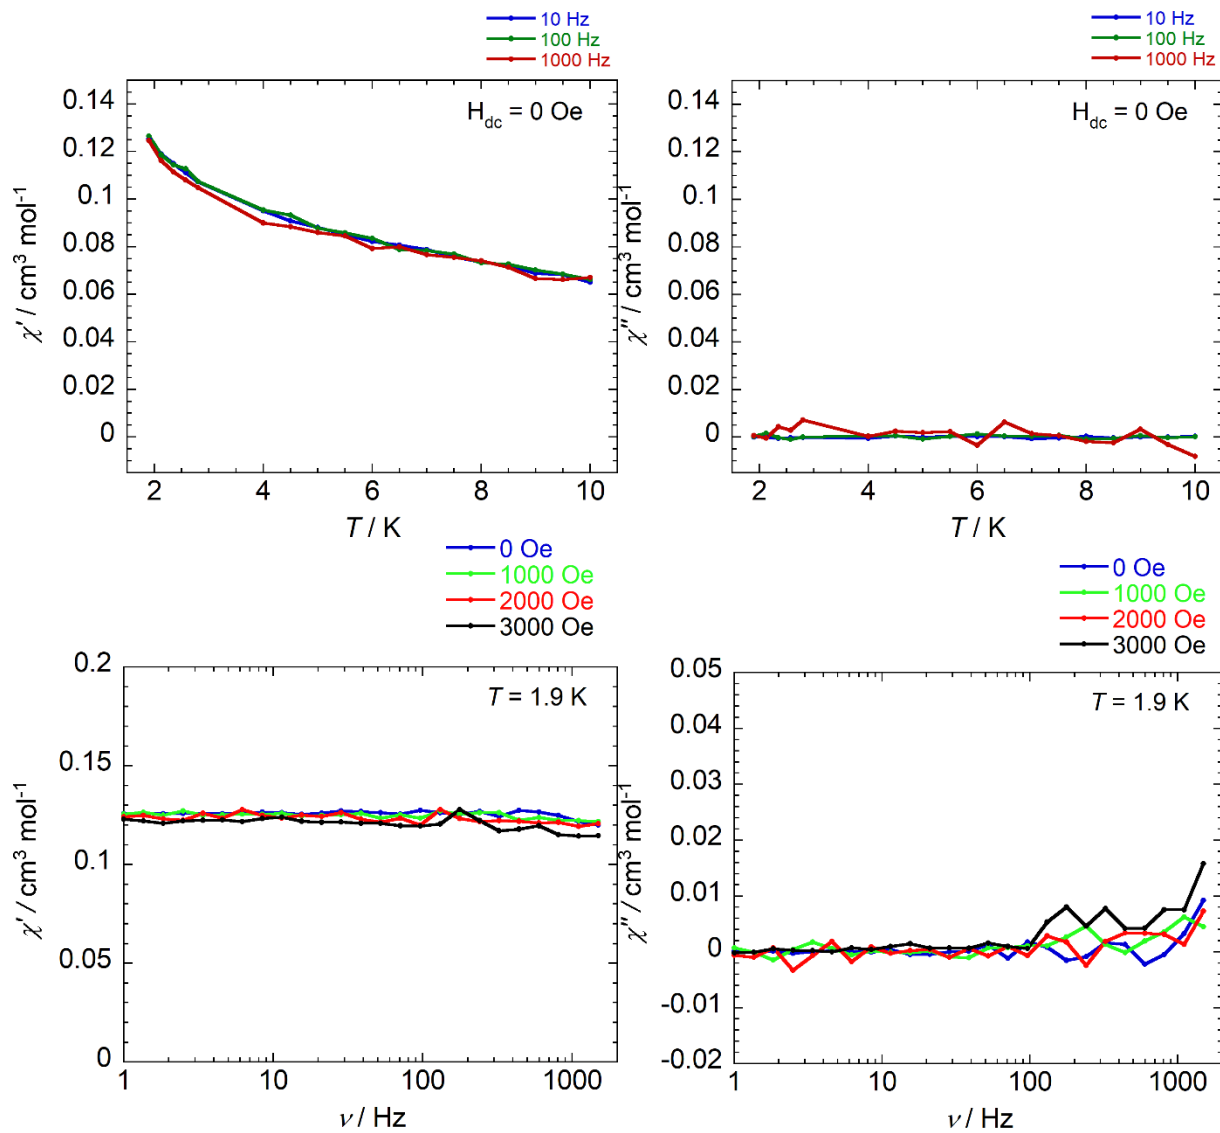

**Fig. S31.** Frequency vs temperature plot of the real ( $\chi'$ , left) and imaginary ( $\chi''$ , right) components of the ac susceptibility at 0 Oe external dc field and different temperatures from 1.9 – 15 K (top) and different external dc field at 1.9 K (bottom), respectively with a 3 Oe ac field for a polycrystalline sample of **1**.

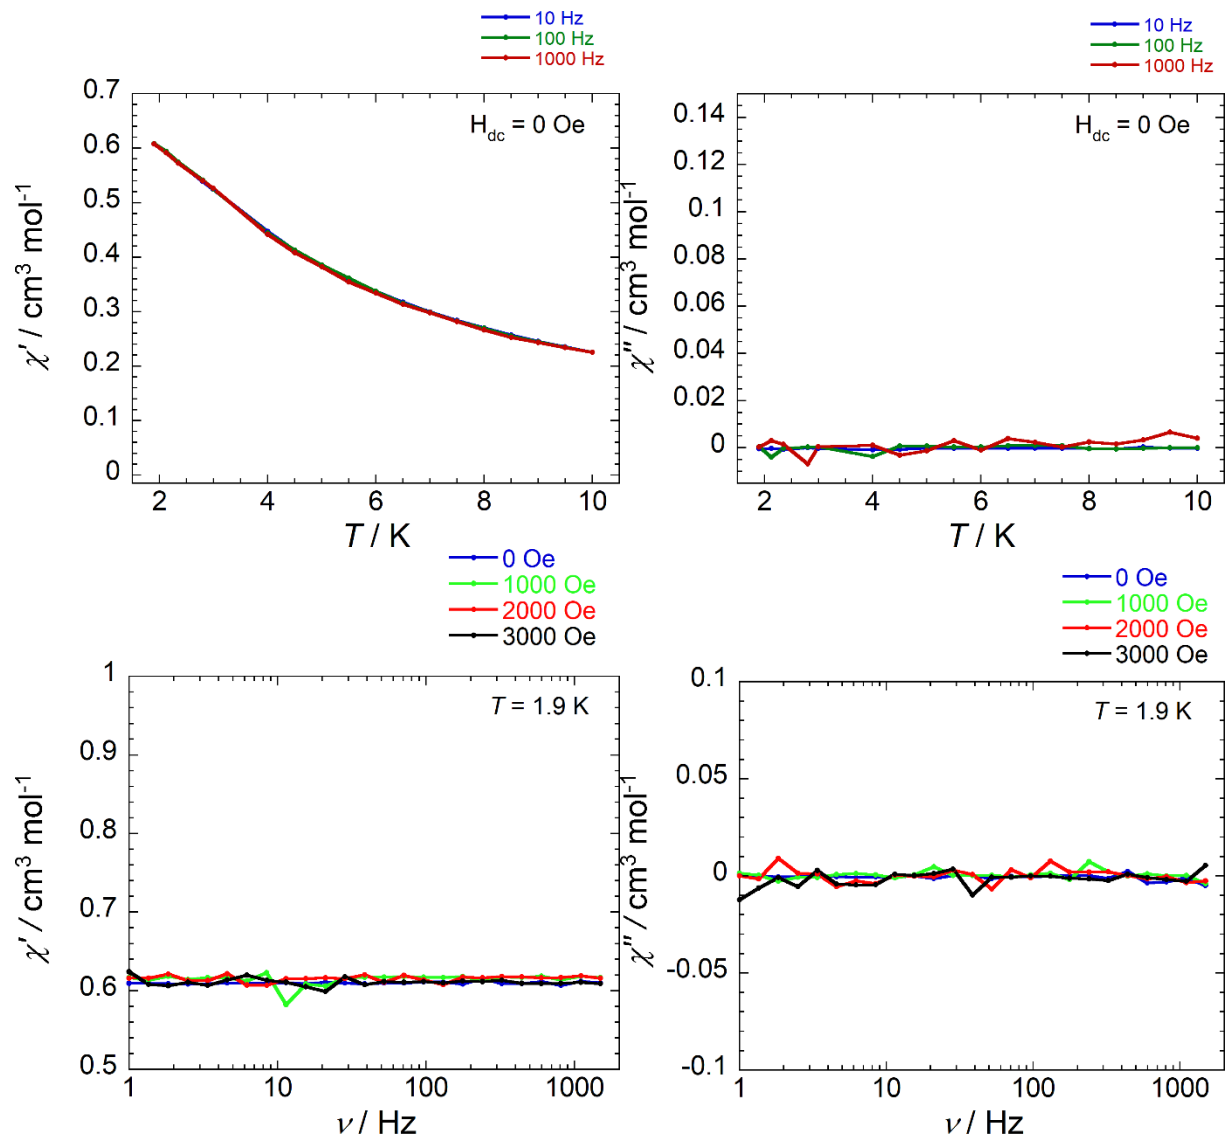

**Fig. S32.** Frequency vs temperature plot of the real ( $\chi'$ , left) and imaginary ( $\chi''$ , right) components of the ac susceptibility at 0 Oe external dc field and different temperatures from 1.9 – 15 K (top) and different external dc field at 1.9 K (bottom), respectively with a 3 Oe ac field for a polycrystalline sample of **2**.

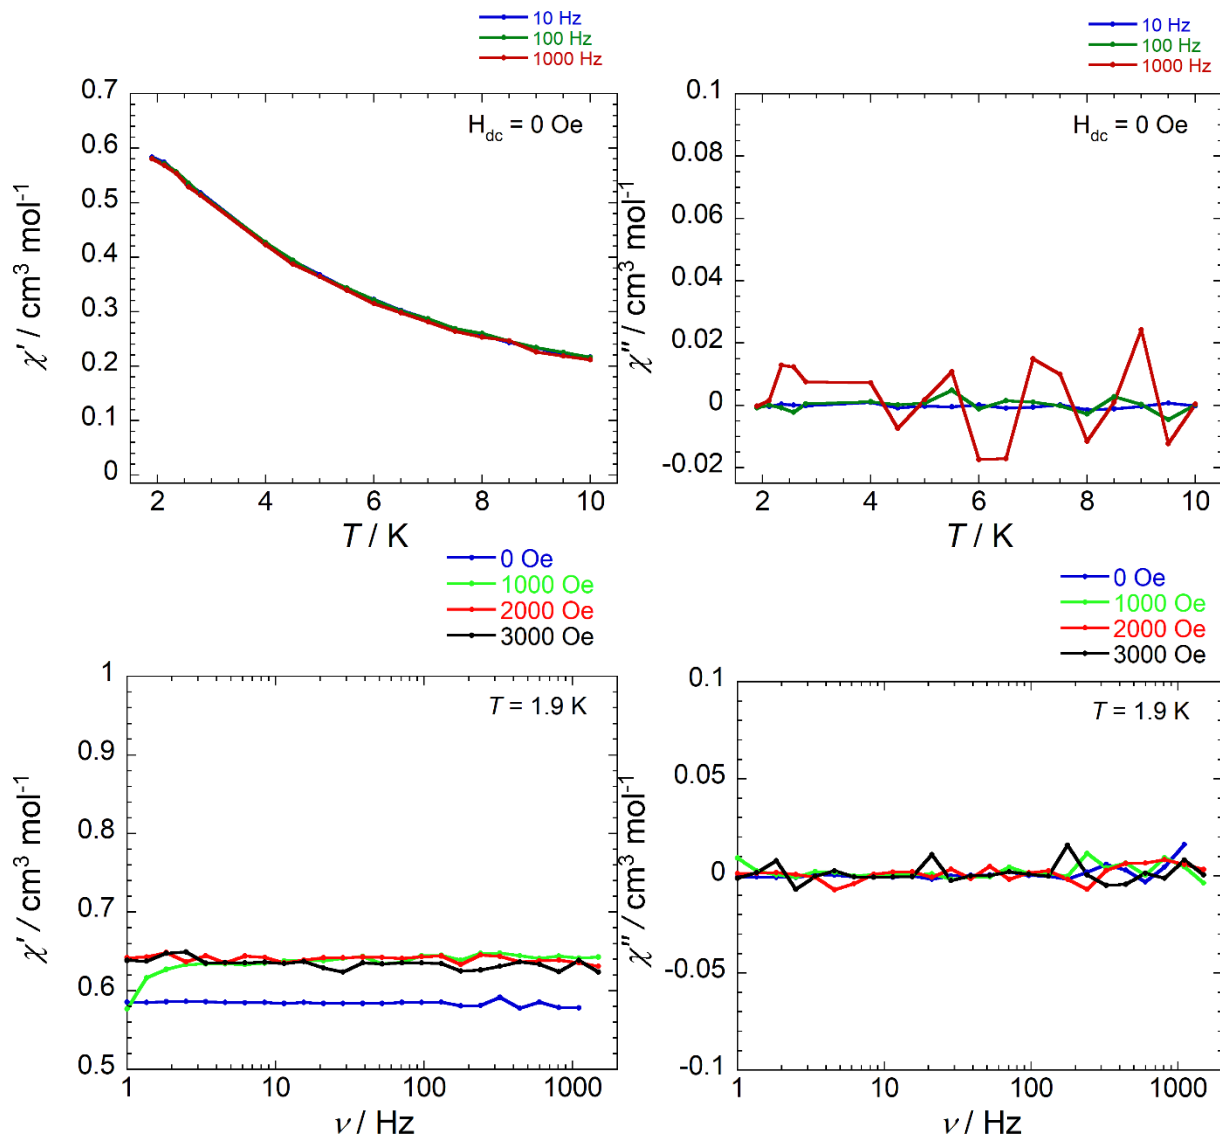

**Fig. S33.** Frequency vs temperature plot of the real ( $\chi'$ , left) and imaginary ( $\chi''$ , right) components of the ac susceptibility at 0 Oe external dc field and different temperatures from 1.9 – 15 K (top) and different external dc field at 1.9 K (bottom), respectively with a 3 Oe ac field for a polycrystalline sample of **3**.

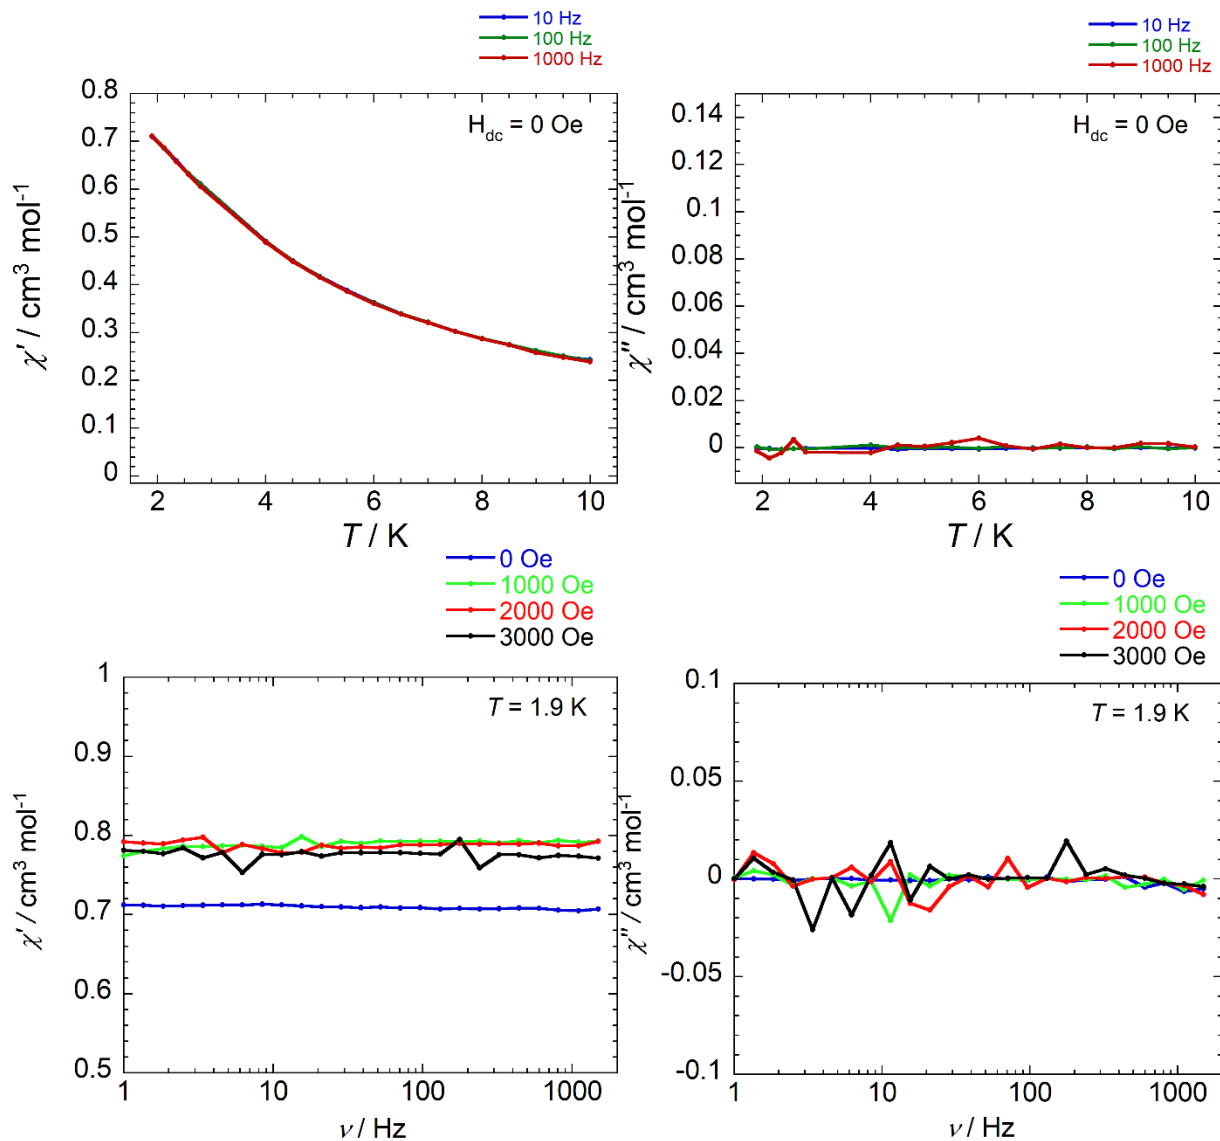

**Fig. S34.** Frequency vs temperature plot of the real ( $\chi'$ , left) and imaginary ( $\chi''$ , right) components of the ac susceptibility at 0 Oe external dc field and different temperatures from 1.9 – 15 K (top) and different external dc field at 1.9 K (bottom), respectively with a 3 Oe ac field for a polycrystalline sample of **4**.

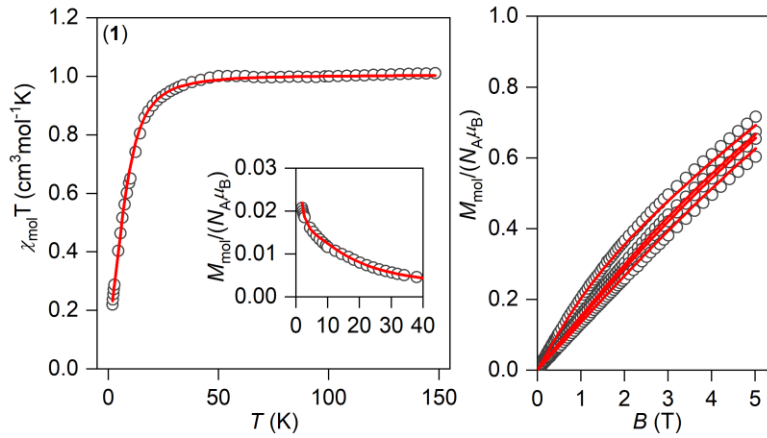

**Fig. S35.** Left: Temperature dependence of  $\chi T$  product for **1**. Field dependence of the magnetization as  $M$  vs  $B$  plot of **1** at 1.9, 5, 6, and 8 K. The empty symbols – experimental data, full lines – calculated data with parameters in text.

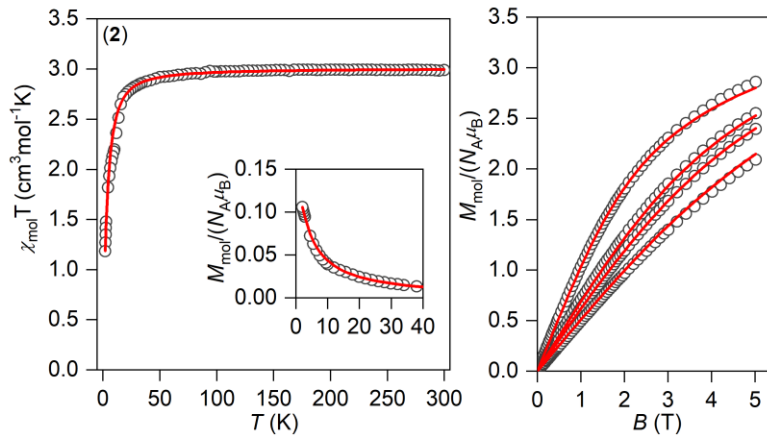

**Fig. S36.** Left: Temperature dependence of  $\chi T$  product for **2**. Field dependence of the magnetization as  $M$  vs  $B$  plot of **2** at 1.9, 5, 6, and 8 K. The empty symbols – experimental data, full lines – calculated data with parameters in text.

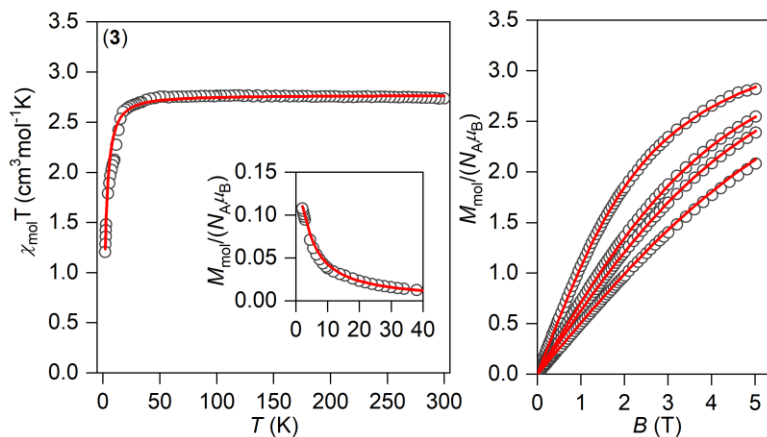

**Fig. S37.** Left: Temperature dependence of  $\chi T$  product for **3**. Field dependence of the magnetization as  $M$  vs  $B$  plot of **3** at 1.9, 5, 6, and 8 K. The empty symbols – experimental data, full lines – calculated data with parameters in text.

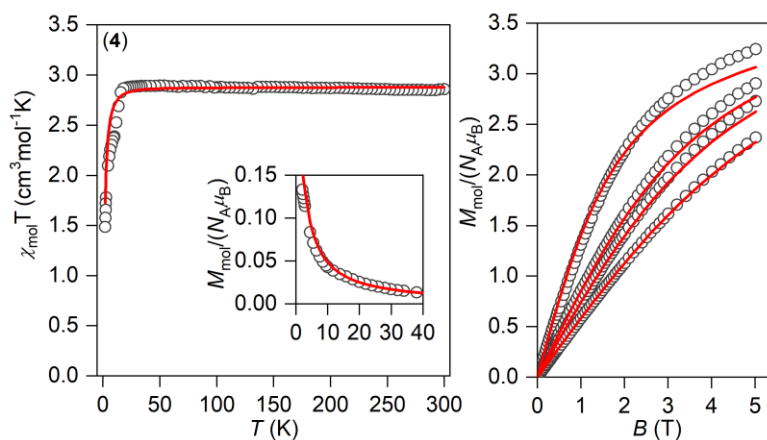

**Fig. S38.** Left: Temperature dependence of  $\chi T$  product for **4**. Field dependence of the magnetization as  $M$  vs  $B$  plot of **4** at 1.9, 5, 6, and 8 K. The empty symbols – experimental data, full lines – calculated data with parameters in text.

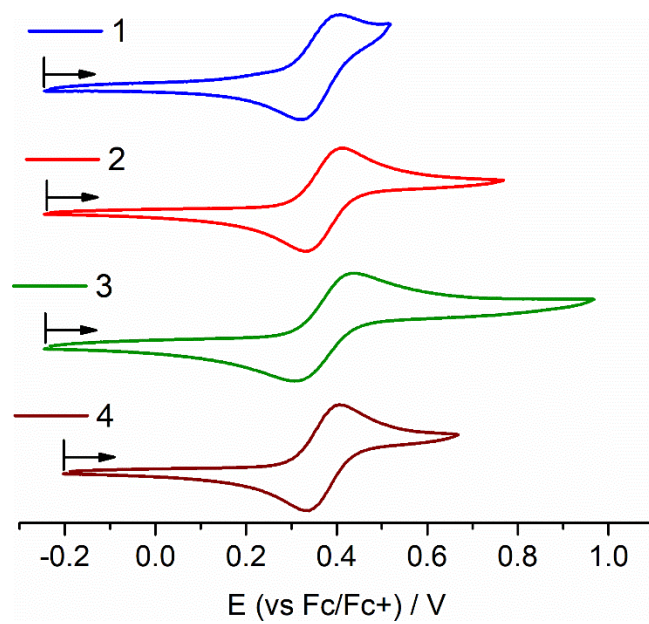

**Fig. S39.** Cyclic voltammograms for reduction of **1** – **4** in 0.2 M (<sup>n</sup>Bu<sub>4</sub>N)PF<sub>6</sub> / MeCN with a scan rate of 100 mV s<sup>-1</sup>. Arrow indicates the open circuit potential with the direction of the potential sweep.



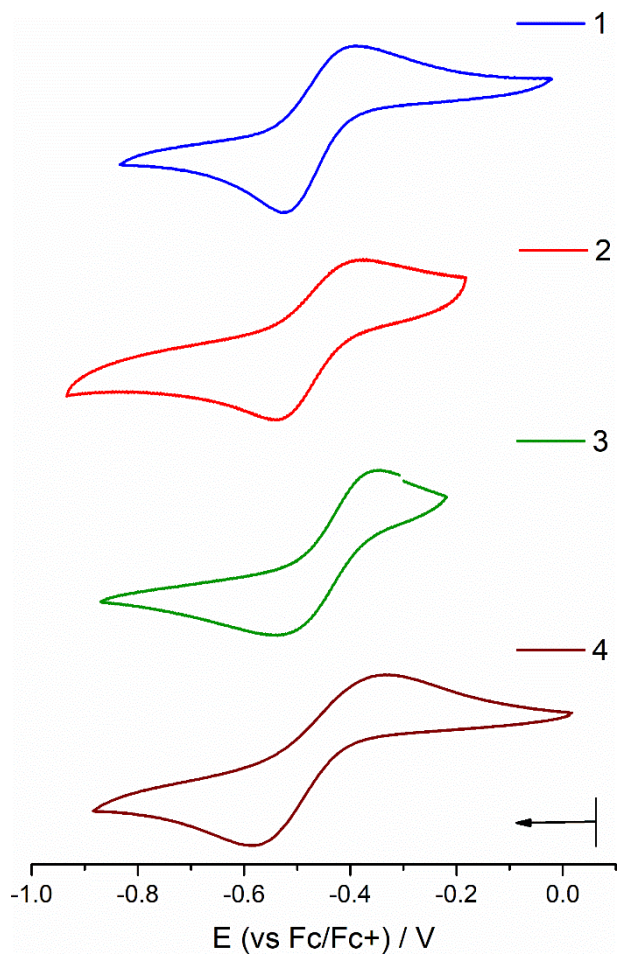

**Fig. S40.** Cyclic voltammograms for reduction of **1** – **4** in 0.2 M  $(n\text{-Bu}_4\text{N})\text{PF}_6 / \text{MeCN}$  with a scan rate of  $100 \text{ mV s}^{-1}$ . Arrow indicates the open circuit potential with the direction of the potential sweep.

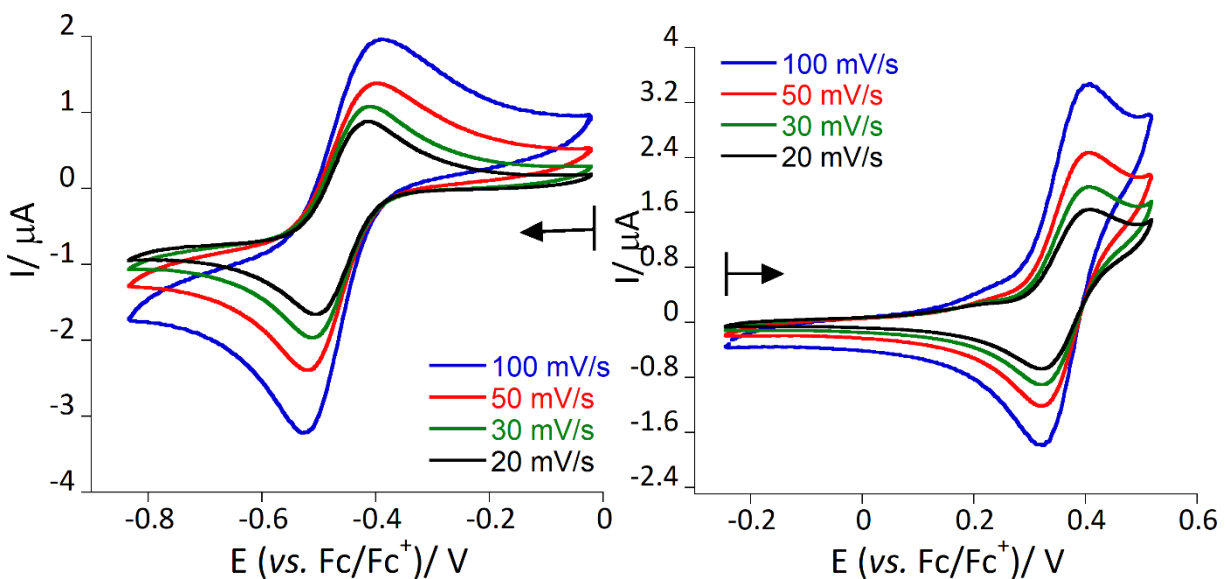

**Fig. S41.** Cyclic voltammograms for reduction (left) and oxidation (right) of **1** in 0.2 M (<sup>n</sup>Bu<sub>4</sub>N)PF<sub>6</sub> / MeCN with different scan rate. Arrow indicates the open circuit potential with the direction of the potential sweep.

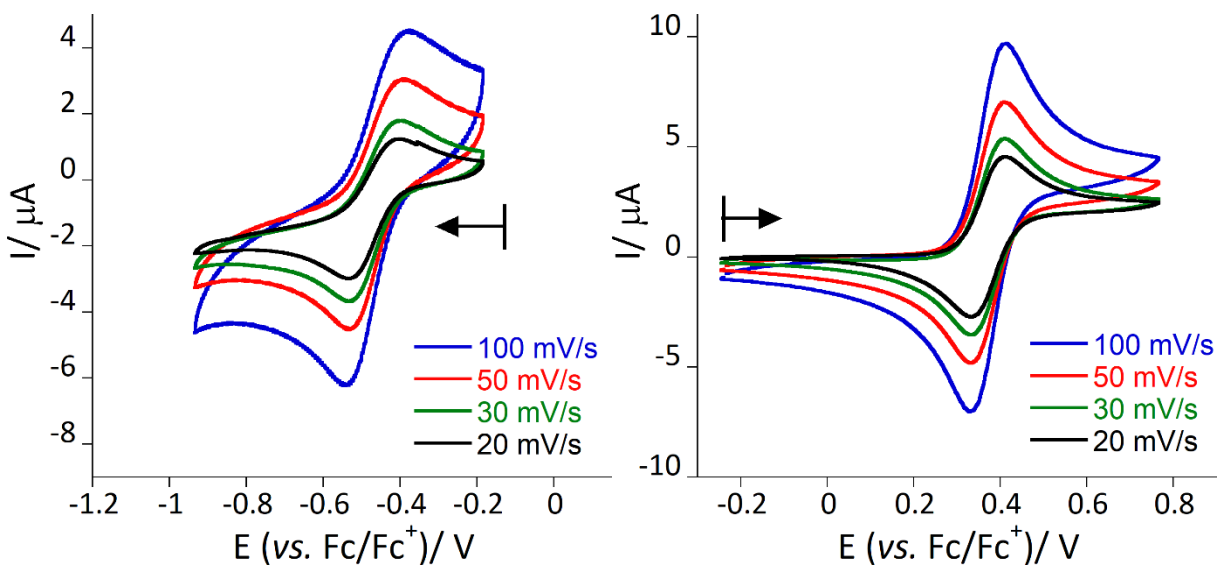

**Fig. S42.** Cyclic voltammograms for reduction (left) and oxidation (right) of **2** in 0.2 M (<sup>n</sup>Bu<sub>4</sub>N)PF<sub>6</sub> / MeCN with different scan rate. Arrow indicates the open circuit potential with the direction of the potential sweep.

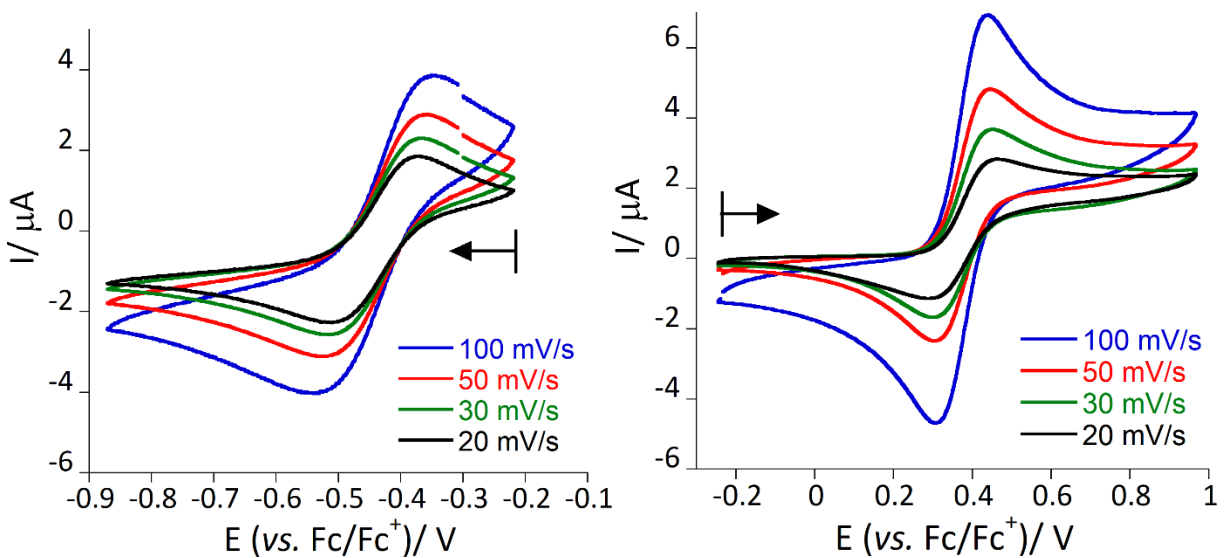

**Fig. S43.** Cyclic voltammograms for reduction (left) and oxidation (right) of **3** in 0.2 M (tBu<sub>4</sub>N)PF<sub>6</sub> / MeCN with different scan rate. Arrow indicates the open circuit potential with the direction of the potential sweep.

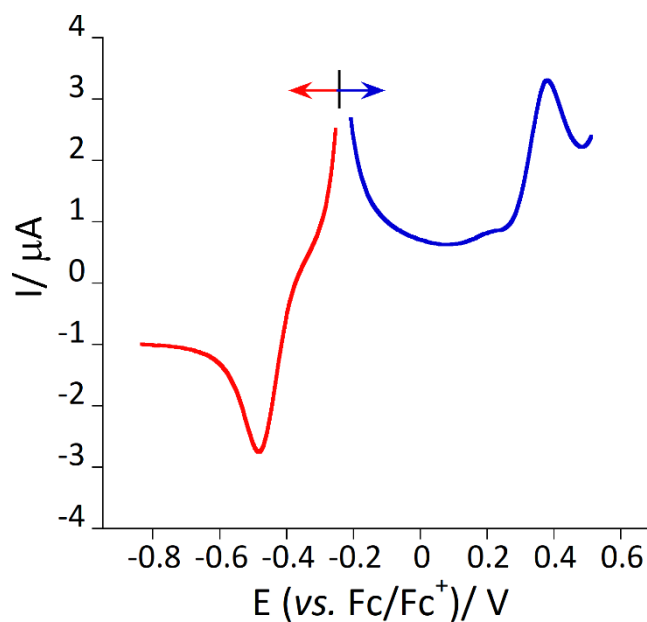

**Fig. S44.** Square wave voltammograms for **1** in 0.2 M (tBu<sub>4</sub>N)PF<sub>6</sub> / MeCN. Arrows indicate the open circuit potential with the direction of the potential sweep.

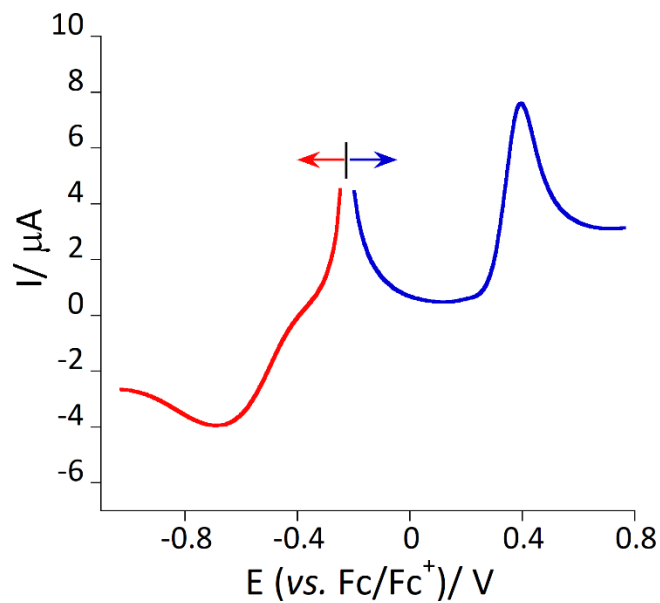

**Fig. S45.** Square wave voltammograms for **2** in 0.2 M  $(^n\text{Bu}_4\text{N})\text{PF}_6 / \text{MeCN}$ . Arrow indicates the open circuit potential with the direction of the potential sweep.

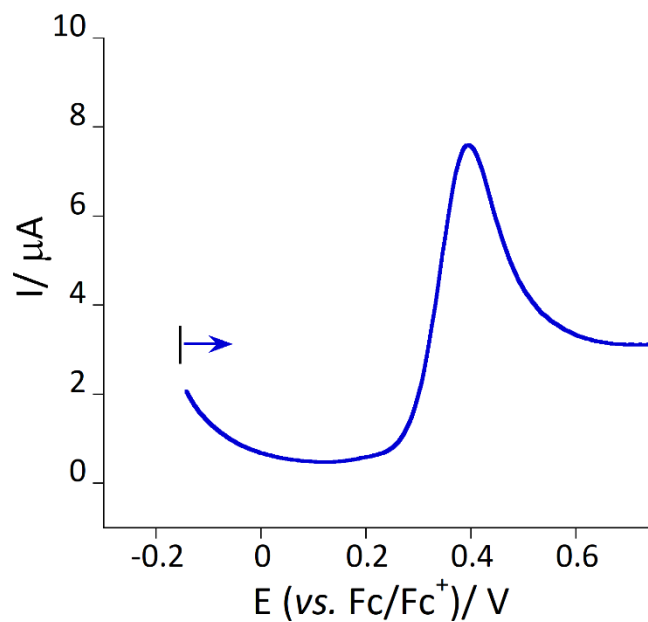

**Fig. S46.** Square wave voltammogram for oxidation of **3** in 0.2 M  $(^n\text{Bu}_4\text{N})\text{PF}_6 / \text{MeCN}$ . Arrow indicates the open circuit potential with the direction of the potential sweep.

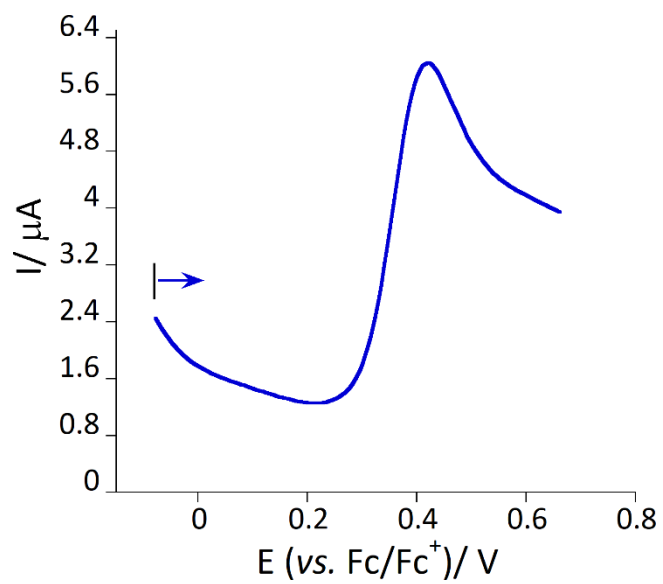

**Fig. S47.** Square wave voltammogram for **4** in 0.2 M  $(t\text{Bu}_4\text{N})\text{PF}_6$  / MeCN. Arrow indicates the open circuit potential with the direction of the potential sweep.

## Tables

**Table S1.** X-ray crystallography data for complexes **1** – **4**.

| Complex                                                                                                             | <b>1</b>                                                           | <b>2</b>                                                           | <b>3</b>                                                                                              | <b>4</b>                                                                          |                                                                                   |
|---------------------------------------------------------------------------------------------------------------------|--------------------------------------------------------------------|--------------------------------------------------------------------|-------------------------------------------------------------------------------------------------------|-----------------------------------------------------------------------------------|-----------------------------------------------------------------------------------|
| CCDC no                                                                                                             | 2098344                                                            | 2098342                                                            | 2098402                                                                                               | 2098404                                                                           | 2098406                                                                           |
| Temperature, K                                                                                                      | 240                                                                | 100                                                                | 100                                                                                                   | 100                                                                               | 100                                                                               |
| Empirical formula                                                                                                   | C <sub>34</sub> H <sub>36</sub> N <sub>8</sub> O <sub>2</sub> ClMn | C <sub>34</sub> H <sub>36</sub> N <sub>8</sub> O <sub>2</sub> ClMn | C <sub>36</sub> H <sub>39</sub> N <sub>9</sub> O <sub>2</sub> BF <sub>4</sub> Mn[+CH <sub>3</sub> CN] | C <sub>38</sub> H <sub>42</sub> N <sub>10</sub> O <sub>2</sub> BF <sub>4</sub> Mn | C <sub>38</sub> H <sub>42</sub> N <sub>10</sub> O <sub>2</sub> BF <sub>4</sub> Mn |
| Mol. Weight, g mol <sup>-1</sup>                                                                                    | 679.10                                                             | 679.10                                                             | 812.57                                                                                                | 825.21                                                                            | 788.62                                                                            |
| Crystal system                                                                                                      | Monoclinic                                                         | Monoclinic                                                         | Monoclinic                                                                                            | Monoclinic                                                                        | Orthorhombic                                                                      |
| Space group                                                                                                         | <i>P2<sub>1</sub>/n</i>                                            | <i>P2<sub>1</sub>/n</i>                                            | <i>P2<sub>1</sub>/n</i>                                                                               | <i>P2<sub>1</sub>/c</i>                                                           | <i>Pccn</i>                                                                       |
| <i>a</i> , Å                                                                                                        | 7.6419(2)                                                          | 7.5907(2)                                                          | 8.1393(4)                                                                                             | 7.9902(4)                                                                         | 19.096(2)                                                                         |
| <i>b</i> , Å                                                                                                        | 8.2294(2)                                                          | 8.1774(2)                                                          | 23.3849(10)                                                                                           | 23.8380(13)                                                                       | 10.6565(14)                                                                       |
| <i>c</i> , Å                                                                                                        | 25.7208(6)                                                         | 25.5929(6)                                                         | 20.7547(9)                                                                                            | 20.9130(11)                                                                       | 17.243(2)                                                                         |
| <i>α</i> , °                                                                                                        | 90                                                                 | 90                                                                 | 90                                                                                                    | 90                                                                                | 90                                                                                |
| <i>β</i> , °                                                                                                        | 91.263(1)                                                          | 90.0310(10)                                                        | 101.029(3)                                                                                            | 97.7740(10)                                                                       | 90                                                                                |
| <i>γ</i> , °                                                                                                        | 90                                                                 | 90                                                                 | 90                                                                                                    | 90                                                                                | 90                                                                                |
| <i>V</i> , Å <sup>3</sup>                                                                                           | 1617.14(7)                                                         | 1588.61(7)                                                         | 3877.4(3)                                                                                             | 3946.7(4)                                                                         | 3508.8(8)                                                                         |
| <i>Z</i>                                                                                                            | 2                                                                  | 2                                                                  | 4                                                                                                     | 4                                                                                 | 4                                                                                 |
| <i>d</i> <sub>cal</sub> , g cm <sup>-3</sup>                                                                        | 1.395                                                              | 1.420                                                              | 1.322                                                                                                 | 1.389                                                                             | 1.493                                                                             |
| <i>μ</i> , mm <sup>-1</sup>                                                                                         | 0.536                                                              | 0.546                                                              | 0.404                                                                                                 | 0.461                                                                             | 0.499                                                                             |
| <i>F</i> (000)                                                                                                      | 708                                                                | 708                                                                | 1600                                                                                                  | 1720                                                                              | 1624                                                                              |
| <i>θ</i> max                                                                                                        | 26.383                                                             | 30.557                                                             | 30.643                                                                                                | 30.497                                                                            | 30.560                                                                            |
| Completeness, %                                                                                                     | 99.8                                                               | 99.8                                                               | 98.8                                                                                                  | 99.3                                                                              | 99.2                                                                              |
| Reflections collected                                                                                               | 3313                                                               | 4864                                                               | 11835                                                                                                 | 11947                                                                             | 5341                                                                              |
| Independent reflections                                                                                             | 2912                                                               | 3952                                                               | 8349                                                                                                  | 9403                                                                              | 3706                                                                              |
| Goodness-of-fit on <i>F</i> <sup>2</sup>                                                                            | 1.169                                                              | 1.035                                                              | 1.025                                                                                                 | 1.038                                                                             | 1.026                                                                             |
| Final R indices [ <i>I</i> >2σ( <i>I</i> )]                                                                         | R1 = 0.0509<br>wR2 = 0.0974                                        | R1 = 0.0362<br>wR2 = 0.0856                                        | R1 = 0.0610<br>wR2 = 0.1532                                                                           | R1 = 0.0535<br>wR2 = 0.1245                                                       | R1 = 0.0400<br>wR2 = 0.0867                                                       |
| Final R indices [all data]                                                                                          | R1 = 0.0608<br>wR2 = 0.1010                                        | R1 = 0.0496<br>wR2 = 0.0919                                        | R1 = 0.0899<br>wR2 = 0.1707                                                                           | R1 = 0.0713<br>wR2 = 0.1344                                                       | R1 = 0.0708<br>wR2 = 0.1004                                                       |
| $R1 = \frac{\sum   Fo  -  Fc  }{\sum  Fo } \text{ and } wR2 = \frac{ \sum w( Fo ^2 -  Fc ^2) }{\sum w(Fo)^2}^{1/2}$ |                                                                    |                                                                    |                                                                                                       |                                                                                   |                                                                                   |

**Table S2.** Selected bond distances (Å) and bond angles (°) in **1**.

| Complex         | <b>1</b>   |            |
|-----------------|------------|------------|
|                 | 240 K      | 100 K      |
| Mn(1)-N(1)      | 2.032(2)   | 2.0332(12) |
| Mn(1)-N(2)      | 1.988(2)   | 1.9854(12) |
| Mn(1)-O(1)      | 1.888(15)  | 1.8861(9)  |
| N(1)-Mn(1)-N(2) | 171.55(9)  | 171.87(5)  |
| N(1)-Mn(1)-N(2) | 90.08(8)   | 90.16(5)   |
| N(1)-Mn(1)-O(1) | 91.90(9)   | 91.74(5)   |
| N(1)-Mn(1)-O(1) | 84.73(8)   | 84.67(5)   |
| N(2)-Mn(1)-O(1) | 94.83(8)   | 94.77(4)   |
| N(2)-Mn(1)-O(1) | 88.26(8)   | 88.54(4)   |
| N(1)-Mn(1)-N(1) | 85.46(13)  | 85.59(7)   |
| N(2)-Mn(1)-N(2) | 95.22(12)  | 94.87(7)   |
| O(1)-Mn(1)-O(1) | 175.42(11) | 175.11(6)  |

**Table S3.** Selected bond distances (Å) and bond angles (°) in **2** and **3** at 100 K.

| Complex         | <b>2</b>   | <b>3</b>   |
|-----------------|------------|------------|
|                 | Mn(1)-N(1) | 2.218(2)   |
| Mn(1)-N(2)      | 2.240(2)   | 2.250(2)   |
| Mn(1)-N(3)      | 2.108(2)   | 2.087(2)   |
| Mn(1)-N(4)      | 2.095(2)   | 2.128(2)   |
| Mn(1)-O(1)      | 1.8825(18) | 1.8714(17) |
| Mn(1)-O(2)      | 1.8651(19) | 1.8744(16) |
| N(1)-Mn(1)-N(2) | 79.52(9)   | 79.54(7)   |
| N(1)-Mn(1)-N(3) | 162.23(9)  | 162.84(8)  |
| N(1)-Mn(1)-N(4) | 85.60(9)   | 84.29(7)   |
| N(1)-Mn(1)-O(1) | 87.53(8)   | 87.86(8)   |
| N(1)-Mn(1)-O(2) | 94.08(9)   | 93.69(7)   |
| N(2)-Mn(1)-N(3) | 84.09(9)   | 84.54(7)   |
| N(2)-Mn(1)-N(4) | 163.27(9)  | 161.60(8)  |
| N(2)-Mn(1)-O(1) | 94.84(9)   | 96.82(7)   |
| N(2)-Mn(1)-O(2) | 86.54(9)   | 86.03(7)   |
| N(3)-Mn(1)-N(4) | 111.50(9)  | 112.37(8)  |
| N(3)-Mn(1)-O(1) | 87.05(9)   | 87.71(8)   |
| N(3)-Mn(1)-O(2) | 91.72(9)   | 91.54(8)   |
| N(4)-Mn(1)-O(1) | 92.09(9)   | 91.24(8)   |
| N(4)-Mn(1)-O(2) | 86.94(9)   | 86.32(7)   |
| O(1)-Mn(1)-O(2) | 178.05(8)  | 176.96(7)  |

**Table S4.** Selected bond distances (Å) and bond angles (°) in **4** at 100 K.

| Complex         | <b>4</b>   |
|-----------------|------------|
| Mn(1)-N(1)      | 2.2455(16) |
| Mn(1)-N(2)      | 2.0953(14) |
| Mn(1)-O(1)      | 1.8716(12) |
| N(1)-Mn(1)-N(2) | 161.21(6)  |
| N(1)-Mn(1)-N(2) | 83.89(6)   |
| N(1)-Mn(1)-O(1) | 94.43(5)   |
| N(1)-Mn(1)-O(1) | 87.22(5)   |
| N(2)-Mn(1)-O(1) | 91.00(5)   |
| N(2)-Mn(1)-O(1) | 87.85(5)   |
| N(1)-Mn(1)-N(1) | 78.43(8)   |
| N(2)-Mn(1)-N(2) | 114.32(8)  |
| O(1)-Mn(1)-O(1) | 177.87(8)  |

**Continuous Shape Measures (CShM) Analysis:**

Continuous Shape Measures (CShM) analyses were carried out to determine the geometry around Mn ion. Based on the values obtained, the idealized polyhedron was matched with the actual coordination spheres. The smallest value is symbolic of the proximity of the actual coordination sphere and idealized polyhedron.

**Table S5:** CShM analysis data for complexes **1 – 4**.

| Complex  | Temp. | Structure |         |               |         |          |
|----------|-------|-----------|---------|---------------|---------|----------|
|          |       | HP - 6    | PPY - 6 | <b>OC - 6</b> | TPR - 6 | JPPY - 6 |
| <b>1</b> | 240 K | 33.454    | 27.764  | <b>0.386</b>  | 14.458  | 31.702   |
|          | 100 K | 33.351    | 27.892  | <b>0.368</b>  | 14.632  | 31.892   |
| <b>2</b> | 100 K | 32.280    | 23.059  | <b>1.661</b>  | 10.329  | 25.821   |
| <b>3</b> | 100 K | 31.966    | 22.526  | <b>1.823</b>  | 9.952   | 25.238   |
| <b>4</b> | 100 K | 32.285    | 22.299  | <b>1.884</b>  | 9.999   | 25.148   |

HP – 6: Hexagon (D6h), PPY – 6 = Pentagonal pyramid, OC – 6: Octahedron (Oh), TPR – 6: Trigonal prism (D3h), JPPY – 6 = Johnson pentagonal pyramid J2 (C5v);

**Octahedral Distortion Parameters<sup>7</sup>**

$\Sigma$  is the sum of the deviation from 90° of the 12 *cis*-angles of the MnN<sub>4</sub>O<sub>2</sub> octahedron;  $\Theta$  is the sum of the deviation from 60° of the 24 trigonal angles of the projection of the MnN<sub>4</sub>O<sub>2</sub> octahedron onto the trigonal faces;  $\zeta$  is the distance distortion parameter, which is the sum of deviation from individual M-N/O bond distances to the mean metal-ligand bond distance.



**Table S6** Selected Non-covalent cation-anion interactions parameters for **1 - 4** at 100 K.

| Complex  | Type of interaction                 | Distance    |
|----------|-------------------------------------|-------------|
| <b>1</b> | N-H...Cl                            | 3.088 (1) Å |
|          | C-H...Cl                            | 3.524 (1) Å |
|          |                                     | 3.386 (2) Å |
| <b>2</b> | N-H...F(BF <sub>4</sub> )           | 3.092 (1) Å |
|          | N-H...N <sub>azo</sub>              | 3.411 (2) Å |
|          | $\pi\cdots\pi$ ( between -PhN=NPh ) | 3.760 (1) Å |
|          |                                     | 3.691 (1) Å |
|          | N=N...N=N                           | 3.538 (2) Å |
| <b>3</b> | N-H...O(ClO <sub>4</sub> )          | 3.099 (2) Å |
|          | N-H...N <sub>azo</sub>              | 3.438 (1) Å |
|          | $\pi\cdots\pi$ ( between -PhN=NPh ) | 3.589 (1) Å |
|          | N=N...N=N                           | 3.602 (1) Å |
| <b>4</b> | N-H...C(Ph)                         | 3.703 (2) Å |
|          | $\pi\cdots\pi$ ( between -PhN=NPh ) | 4.301 (1) Å |
|          | N=N...N=N                           | 4.138 (3) Å |

**Table S7:** Individual contributions to D-tensor for **1 - 4** calculated by CASSCF/NEVPT2.

| <b>1</b> |      |      |        |        | <b>2</b> |      |      |        |        | <b>3</b> |      |      |        |        | <b>4</b> |      |      |        |        |
|----------|------|------|--------|--------|----------|------|------|--------|--------|----------|------|------|--------|--------|----------|------|------|--------|--------|
| Block    | Mult | Root | D      | E      | Block    | Mult | Root | D      | E      | Block    | Mult | Root | D      | E      | Block    | Mult | Root | D      | E      |
| 0        | 5    | 0    | 0.000  | 0.000  | 0        | 5    | 1    | -0.027 | -0.001 | 0        | 5    | 1    | -0.027 | -0.002 | 0        | 5    | 1    | -0.030 | -0.001 |
| 0        | 5    | 1    | 0.000  | 0.000  | 0        | 5    | 2    | 0.568  | 0.566  | 0        | 5    | 2    | 0.571  | 0.471  | 0        | 5    | 2    | 0.569  | 0.569  |
| 0        | 5    | 2    | 0.000  | 0.000  | 0        | 5    | 3    | 0.375  | -0.375 | 0        | 5    | 3    | 0.372  | -0.274 | 0        | 5    | 3    | 0.375  | -0.376 |
| 0        | 5    | 3    | 0.000  | 0.000  | 0        | 5    | 4    | 0.012  | 0.011  | 0        | 5    | 4    | 0.007  | 0.006  | 0        | 5    | 4    | 0.013  | 0.013  |
| 0        | 5    | 4    | 0.000  | 0.000  | 1        | 3    | 0    | 4.230  | 0.008  | 1        | 3    | 0    | 3.985  | 0.007  | 1        | 3    | 0    | 3.770  | 0.010  |
| 1        | 3    | 1    | 4.850  | 5.263  | 1        | 3    | 1    | -0.389 | -0.388 | 1        | 3    | 1    | -0.364 | -0.244 | 1        | 3    | 1    | -0.346 | -0.346 |
| 1        | 3    | 2    | 1.746  | -1.746 | 1        | 3    | 2    | -0.222 | 0.279  | 1        | 3    | 2    | -0.218 | 0.239  | 1        | 3    | 2    | -0.202 | 0.264  |
| 1        | 3    | 3    | -0.029 | 0.006  | 1        | 3    | 3    | -0.001 | -0.001 | 1        | 3    | 3    | -0.000 | -0.000 | 1        | 3    | 3    | -0.001 | -0.001 |
| 1        | 3    | 4    | 2.103  | -2.103 | 1        | 3    | 4    | -0.086 | 0.133  | 1        | 3    | 4    | -0.075 | 0.112  | 1        | 3    | 4    | -0.107 | 0.148  |
| 1        | 3    | 5    | 0.002  | -0.002 | 1        | 3    | 5    | -0.005 | -0.006 | 1        | 3    | 5    | 0.027  | -0.004 | 1        | 3    | 5    | -0.010 | -0.010 |
| 1        | 3    | 6    | 1.830  | 1.835  | 1        | 3    | 6    | 0.063  | 0.007  | 1        | 3    | 6    | 0.031  | 0.004  | 1        | 3    | 6    | 0.061  | 0.005  |
| 1        | 3    | 7    | 0.120  | 0.120  | 1        | 3    | 7    | -0.036 | -0.035 | 1        | 3    | 7    | -0.042 | -0.000 | 1        | 3    | 7    | -0.041 | -0.041 |
| 1        | 3    | 8    | 0.100  | -0.100 | 1        | 3    | 8    | -0.006 | -0.006 | 1        | 3    | 8    | 0.003  | -0.007 | 1        | 3    | 8    | -0.004 | -0.004 |
| 1        | 3    | 9    | 0.008  | -0.008 | 1        | 3    | 9    | -0.054 | 0.111  | 1        | 3    | 9    | -0.070 | 0.072  | 1        | 3    | 9    | 0.139  | 0.086  |
| 1        | 3    | 10   | -1.215 | 0.033  | 1        | 3    | 10   | 0.538  | 0.010  | 1        | 3    | 10   | 0.579  | 0.000  | 1        | 3    | 10   | 0.458  | 0.041  |
| 1        | 3    | 11   | -0.730 | 0.028  | 1        | 3    | 11   | -0.081 | -0.081 | 1        | 3    | 11   | -0.078 | -0.076 | 1        | 3    | 11   | -0.080 | -0.080 |
| 1        | 3    | 12   | 0.033  | -0.033 | 1        | 3    | 12   | 0.025  | 0.006  | 1        | 3    | 12   | 0.020  | 0.006  | 1        | 3    | 12   | 0.013  | 0.008  |
| 1        | 3    | 13   | -0.928 | 0.029  | 1        | 3    | 13   | 0.747  | 0.029  | 1        | 3    | 13   | 0.741  | 0.028  | 1        | 3    | 13   | 0.776  | 0.018  |
| 1        | 3    | 14   | 0.019  | -0.019 | 1        | 3    | 14   | -0.001 | -0.001 | 1        | 3    | 14   | 0.007  | -0.001 | 1        | 3    | 14   | -0.002 | -0.002 |
| 1        | 3    | 15   | 0.014  | 0.016  | 1        | 3    | 15   | -0.032 | 0.176  | 1        | 3    | 15   | -0.114 | 0.209  | 1        | 3    | 15   | -0.161 | 0.227  |
| 1        | 3    | 16   | 0.039  | -0.039 | 1        | 3    | 16   | -0.028 | -0.028 | 1        | 3    | 16   | -0.027 | -0.025 | 1        | 3    | 16   | -0.022 | -0.022 |
| 1        | 3    | 17   | 0.016  | -0.016 | 1        | 3    | 17   | -0.073 | 0.081  | 1        | 3    | 17   | -0.041 | 0.044  | 1        | 3    | 17   | -0.033 | 0.039  |
| 1        | 3    | 18   | 0.022  | 0.032  | 1        | 3    | 18   | -0.001 | -0.001 | 1        | 3    | 18   | -0.007 | -0.004 | 1        | 3    | 18   | -0.005 | -0.005 |
| 1        | 3    | 19   | 0.000  | 0.000  | 1        | 3    | 19   | 0.017  | 0.004  | 1        | 3    | 19   | -0.112 | -0.076 | 1        | 3    | 19   | 0.020  | 0.002  |
| 1        | 3    | 20   | 0.021  | -0.021 | 1        | 3    | 20   | -0.392 | -0.387 | 1        | 3    | 20   | -0.187 | -0.044 | 1        | 3    | 20   | -0.393 | -0.393 |
| 1        | 3    | 21   | 0.008  | -0.008 | 1        | 3    | 21   | -0.026 | 0.021  | 1        | 3    | 21   | -0.074 | -0.075 | 1        | 3    | 21   | -0.031 | 0.031  |
| 1        | 3    | 22   | 0.017  | 0.017  | 1        | 3    | 22   | -0.175 | 0.175  | 1        | 3    | 22   | -0.186 | 0.045  | 1        | 3    | 22   | -0.171 | 0.174  |
| 1        | 3    | 23   | 0.002  | -0.002 | 1        | 3    | 23   | -0.009 | -0.009 | 1        | 3    | 23   | -0.007 | -0.006 | 1        | 3    | 23   | -0.012 | -0.012 |
| 1        | 3    | 24   | 0.044  | 0.056  | 1        | 3    | 24   | -0.008 | -0.008 | 1        | 3    | 24   | -0.008 | -0.008 | 1        | 3    | 24   | -0.006 | -0.006 |
| 1        | 3    | 25   | 0.019  | -0.019 | 1        | 3    | 25   | -0.014 | 0.019  | 1        | 3    | 25   | -0.012 | 0.007  | 1        | 3    | 25   | -0.010 | 0.014  |
| 1        | 3    | 26   | 0.002  | -0.002 | 1        | 3    | 26   | -0.001 | 0.002  | 1        | 3    | 26   | -0.001 | 0.002  | 1        | 3    | 26   | -0.001 | 0.002  |
| 1        | 3    | 27   | 0.019  | 0.020  | 1        | 3    | 27   | -0.013 | -0.013 | 1        | 3    | 27   | -0.009 | -0.006 | 1        | 3    | 27   | -0.006 | -0.006 |
| 1        | 3    | 28   | 0.064  | -0.064 | 1        | 3    | 28   | -0.007 | -0.007 | 1        | 3    | 28   | -0.007 | -0.005 | 1        | 3    | 28   | -0.007 | -0.007 |
| 1        | 3    | 29   | 0.010  | 0.014  | 1        | 3    | 29   | -0.000 | -0.000 | 1        | 3    | 29   | -0.000 | -0.000 | 1        | 3    | 29   | -0.000 | -0.000 |

|   |   |    |        |        |   |   |    |        |        |   |   |    |        |        |   |   |    |        |        |
|---|---|----|--------|--------|---|---|----|--------|--------|---|---|----|--------|--------|---|---|----|--------|--------|
| 1 | 3 | 30 | 0.001  | 0.001  | 1 | 3 | 30 | -0.012 | 0.013  | 1 | 3 | 30 | -0.012 | 0.009  | 1 | 3 | 30 | -0.014 | 0.015  |
| 1 | 3 | 31 | 0.000  | 0.001  | 1 | 3 | 31 | -0.002 | -0.002 | 1 | 3 | 31 | -0.002 | -0.000 | 1 | 3 | 31 | -0.001 | 0.001  |
| 1 | 3 | 32 | 0.002  | 0.003  | 1 | 3 | 32 | -0.002 | 0.002  | 1 | 3 | 32 | -0.002 | -0.002 | 1 | 3 | 32 | -0.002 | -0.002 |
| 1 | 3 | 33 | 0.000  | -0.000 | 1 | 3 | 33 | -0.020 | -0.020 | 1 | 3 | 33 | -0.021 | -0.017 | 1 | 3 | 33 | -0.022 | -0.022 |
| 1 | 3 | 34 | 0.000  | -0.000 | 1 | 3 | 34 | 0.003  | 0.000  | 1 | 3 | 34 | 0.003  | -0.000 | 1 | 3 | 34 | 0.003  | 0.000  |
| 1 | 3 | 35 | 0.002  | -0.002 | 1 | 3 | 35 | 0.001  | 0.000  | 1 | 3 | 35 | 0.001  | 0.000  | 1 | 3 | 35 | 0.001  | 0.000  |
| 1 | 3 | 36 | 0.001  | 0.001  | 1 | 3 | 36 | -0.001 | 0.001  | 1 | 3 | 36 | -0.001 | 0.001  | 1 | 3 | 36 | -0.001 | 0.002  |
| 1 | 3 | 37 | 0.000  | -0.000 | 1 | 3 | 37 | -0.000 | -0.000 | 1 | 3 | 37 | -0.000 | -0.000 | 1 | 3 | 37 | -0.000 | -0.000 |
| 1 | 3 | 38 | 0.000  | -0.000 | 1 | 3 | 38 | -0.001 | 0.001  | 1 | 3 | 38 | -0.000 | 0.000  | 1 | 3 | 38 | -0.001 | 0.001  |
| 1 | 3 | 39 | 0.001  | -0.001 | 1 | 3 | 39 | -0.000 | -0.000 | 1 | 3 | 39 | -0.000 | -0.000 | 1 | 3 | 39 | -0.000 | -0.000 |
| 1 | 3 | 40 | 0.000  | 0.000  | 1 | 3 | 40 | -0.003 | -0.003 | 1 | 3 | 40 | -0.003 | -0.001 | 1 | 3 | 40 | -0.003 | -0.003 |
| 1 | 3 | 41 | -0.000 | 0.000  | 1 | 3 | 41 | 0.000  | 0.000  | 1 | 3 | 41 | 0.000  | 0.000  | 1 | 3 | 41 | 0.000  | 0.000  |
| 1 | 3 | 42 | 0.000  | -0.000 | 1 | 3 | 42 | -0.000 | -0.000 | 1 | 3 | 42 | -0.000 | 0.000  | 1 | 3 | 42 | -0.000 | -0.000 |
| 1 | 3 | 43 | 0.004  | 0.005  | 1 | 3 | 43 | -0.000 | 0.001  | 1 | 3 | 43 | -0.001 | 0.001  | 1 | 3 | 43 | -0.001 | 0.001  |
| 1 | 3 | 44 | 0.003  | -0.003 | 1 | 3 | 44 | 0.045  | 0.000  | 1 | 3 | 44 | 0.044  | 0.000  | 1 | 3 | 44 | 0.044  | 0.000  |
| 2 | 1 | 0  | 1.204  | -0.093 | 2 | 1 | 0  | 0.000  | 0.000  | 2 | 1 | 0  | 0.000  | 0.000  | 2 | 1 | 0  | 0.000  | 0.000  |
| 2 | 1 | 1  | -0.143 | 0.143  | 2 | 1 | 1  | 0.000  | 0.000  | 2 | 1 | 1  | 0.000  | 0.000  | 2 | 1 | 1  | 0.000  | 0.000  |
| 2 | 1 | 2  | -1.587 | -1.698 | 2 | 1 | 2  | 0.000  | 0.000  | 2 | 1 | 2  | 0.000  | 0.000  | 2 | 1 | 2  | 0.000  | 0.000  |
| 2 | 1 | 3  | -1.237 | 1.237  | 2 | 1 | 3  | 0.000  | 0.000  | 2 | 1 | 3  | 0.000  | 0.000  | 2 | 1 | 3  | 0.000  | 0.000  |
| 2 | 1 | 4  | 2.024  | -0.015 | 2 | 1 | 4  | 0.000  | 0.000  | 2 | 1 | 4  | 0.000  | 0.000  | 2 | 1 | 4  | 0.000  | 0.000  |
| 2 | 1 | 5  | 4.815  | -0.015 | 2 | 1 | 5  | 0.000  | 0.000  | 2 | 1 | 5  | 0.000  | 0.000  | 2 | 1 | 5  | 0.000  | 0.000  |
| 2 | 1 | 6  | -0.704 | 0.704  | 2 | 1 | 6  | 0.000  | 0.000  | 2 | 1 | 6  | 0.000  | 0.000  | 2 | 1 | 6  | 0.000  | 0.000  |
| 2 | 1 | 7  | -0.039 | -0.120 | 2 | 1 | 7  | 0.000  | 0.000  | 2 | 1 | 7  | 0.000  | 0.000  | 2 | 1 | 7  | 0.000  | 0.000  |
| 2 | 1 | 8  | -0.451 | 0.451  | 2 | 1 | 8  | 0.000  | 0.000  | 2 | 1 | 8  | 0.000  | 0.000  | 2 | 1 | 8  | 0.000  | 0.000  |
| 2 | 1 | 9  | -0.791 | -0.809 | 2 | 1 | 9  | 0.000  | 0.000  | 2 | 1 | 9  | 0.000  | 0.000  | 2 | 1 | 9  | 0.000  | 0.000  |
| 2 | 1 | 10 | -0.219 | 0.219  | 2 | 1 | 10 | 0.000  | 0.000  | 2 | 1 | 10 | 0.000  | 0.000  | 2 | 1 | 10 | 0.000  | 0.000  |
| 2 | 1 | 11 | -0.000 | 0.000  | 2 | 1 | 11 | 0.000  | 0.000  | 2 | 1 | 11 | 0.000  | 0.000  | 2 | 1 | 11 | 0.000  | 0.000  |
| 2 | 1 | 12 | -0.171 | -0.316 | 2 | 1 | 12 | 0.000  | 0.000  | 2 | 1 | 12 | 0.000  | 0.000  | 2 | 1 | 12 | 0.000  | 0.000  |
| 2 | 1 | 13 | 0.891  | -0.006 | 2 | 1 | 13 | 0.000  | 0.000  | 2 | 1 | 13 | 0.000  | 0.000  | 2 | 1 | 13 | 0.000  | 0.000  |
| 2 | 1 | 14 | -0.010 | 0.010  | 2 | 1 | 14 | 0.000  | 0.000  | 2 | 1 | 14 | 0.000  | 0.000  | 2 | 1 | 14 | 0.000  | 0.000  |
| 2 | 1 | 15 | 0.001  | -0.000 | 2 | 1 | 15 | 0.000  | 0.000  | 2 | 1 | 15 | 0.000  | 0.000  | 2 | 1 | 15 | 0.000  | 0.000  |
| 2 | 1 | 16 | -0.026 | -0.026 | 2 | 1 | 16 | 0.000  | 0.000  | 2 | 1 | 16 | 0.000  | 0.000  | 2 | 1 | 16 | 0.000  | 0.000  |
| 2 | 1 | 17 | -0.002 | 0.002  | 2 | 1 | 17 | 0.000  | 0.000  | 2 | 1 | 17 | 0.000  | 0.000  | 2 | 1 | 17 | 0.000  | 0.000  |
| 2 | 1 | 18 | 0.006  | -0.003 | 2 | 1 | 18 | 0.000  | 0.000  | 2 | 1 | 18 | 0.000  | 0.000  | 2 | 1 | 18 | 0.000  | 0.000  |
| 2 | 1 | 19 | -0.022 | 0.022  | 2 | 1 | 19 | 0.000  | 0.000  | 2 | 1 | 19 | 0.000  | 0.000  | 2 | 1 | 19 | 0.000  | 0.000  |
| 2 | 1 | 20 | 0.016  | -0.002 | 2 | 1 | 20 | 0.000  | 0.000  | 2 | 1 | 20 | 0.000  | 0.000  | 2 | 1 | 20 | 0.000  | 0.000  |
| 2 | 1 | 21 | -0.024 | 0.024  | 2 | 1 | 21 | 0.000  | 0.000  | 2 | 1 | 21 | 0.000  | 0.000  | 2 | 1 | 21 | 0.000  | 0.000  |
| 2 | 1 | 22 | 0.057  | -0.000 | 2 | 1 | 22 | 0.000  | 0.000  | 2 | 1 | 22 | 0.000  | 0.000  | 2 | 1 | 22 | 0.000  | 0.000  |
| 2 | 1 | 23 | -0.003 | 0.003  | 2 | 1 | 23 | 0.000  | 0.000  | 2 | 1 | 23 | 0.000  | 0.000  | 2 | 1 | 23 | 0.000  | 0.000  |
| 2 | 1 | 24 | -0.005 | -0.006 | 2 | 1 | 24 | 0.000  | 0.000  | 2 | 1 | 24 | 0.000  | 0.000  | 2 | 1 | 24 | 0.000  | 0.000  |

|   |   |    |        |        |   |   |    |       |       |   |   |    |       |       |   |   |    |       |       |
|---|---|----|--------|--------|---|---|----|-------|-------|---|---|----|-------|-------|---|---|----|-------|-------|
| 2 | 1 | 25 | -0.017 | -0.020 | 2 | 1 | 25 | 0.000 | 0.000 | 2 | 1 | 25 | 0.000 | 0.000 | 2 | 1 | 25 | 0.000 | 0.000 |
| 2 | 1 | 26 | -0.013 | 0.013  | 2 | 1 | 26 | 0.000 | 0.000 | 2 | 1 | 26 | 0.000 | 0.000 | 2 | 1 | 26 | 0.000 | 0.000 |
| 2 | 1 | 27 | 0.063  | -0.000 | 2 | 1 | 27 | 0.000 | 0.000 | 2 | 1 | 27 | 0.000 | 0.000 | 2 | 1 | 27 | 0.000 | 0.000 |
| 2 | 1 | 28 | 0.000  | -0.000 | 2 | 1 | 28 | 0.000 | 0.000 | 2 | 1 | 28 | 0.000 | 0.000 | 2 | 1 | 28 | 0.000 | 0.000 |
| 2 | 1 | 29 | -0.035 | -0.039 | 2 | 1 | 29 | 0.000 | 0.000 | 2 | 1 | 29 | 0.000 | 0.000 | 2 | 1 | 29 | 0.000 | 0.000 |
| 2 | 1 | 30 | -0.021 | 0.021  | 2 | 1 | 30 | 0.000 | 0.000 | 2 | 1 | 30 | 0.000 | 0.000 | 2 | 1 | 30 | 0.000 | 0.000 |
| 2 | 1 | 31 | -0.012 | 0.012  | 2 | 1 | 31 | 0.000 | 0.000 | 2 | 1 | 31 | 0.000 | 0.000 | 2 | 1 | 31 | 0.000 | 0.000 |
| 2 | 1 | 32 | -0.001 | 0.001  | 2 | 1 | 32 | 0.000 | 0.000 | 2 | 1 | 32 | 0.000 | 0.000 | 2 | 1 | 32 | 0.000 | 0.000 |
| 2 | 1 | 33 | 0.002  | -0.000 | 2 | 1 | 33 | 0.000 | 0.000 | 2 | 1 | 33 | 0.000 | 0.000 | 2 | 1 | 33 | 0.000 | 0.000 |
| 2 | 1 | 34 | -0.000 | 0.000  | 2 | 1 | 34 | 0.000 | 0.000 | 2 | 1 | 34 | 0.000 | 0.000 | 2 | 1 | 34 | 0.000 | 0.000 |
| 2 | 1 | 35 | -0.004 | 0.004  | 2 | 1 | 35 | 0.000 | 0.000 | 2 | 1 | 35 | 0.000 | 0.000 | 2 | 1 | 35 | 0.000 | 0.000 |
| 2 | 1 | 36 | -0.000 | 0.000  | 2 | 1 | 36 | 0.000 | 0.000 | 2 | 1 | 36 | 0.000 | 0.000 | 2 | 1 | 36 | 0.000 | 0.000 |
| 2 | 1 | 37 | 0.006  | -0.001 | 2 | 1 | 37 | 0.000 | 0.000 | 2 | 1 | 37 | 0.000 | 0.000 | 2 | 1 | 37 | 0.000 | 0.000 |
| 2 | 1 | 38 | -0.001 | -0.002 | 2 | 1 | 38 | 0.000 | 0.000 | 2 | 1 | 38 | 0.000 | 0.000 | 2 | 1 | 38 | 0.000 | 0.000 |
| 2 | 1 | 39 | -0.000 | 0.000  | 2 | 1 | 39 | 0.000 | 0.000 | 2 | 1 | 39 | 0.000 | 0.000 | 2 | 1 | 39 | 0.000 | 0.000 |
| 2 | 1 | 40 | -0.000 | 0.000  | 2 | 1 | 40 | 0.000 | 0.000 | 2 | 1 | 40 | 0.000 | 0.000 | 2 | 1 | 40 | 0.000 | 0.000 |
| 2 | 1 | 41 | 0.004  | -0.000 | 2 | 1 | 41 | 0.000 | 0.000 | 2 | 1 | 41 | 0.000 | 0.000 | 2 | 1 | 41 | 0.000 | 0.000 |
| 2 | 1 | 42 | -0.000 | -0.000 | 2 | 1 | 42 | 0.000 | 0.000 | 2 | 1 | 42 | 0.000 | 0.000 | 2 | 1 | 42 | 0.000 | 0.000 |
| 2 | 1 | 43 | 0.001  | -0.000 | 2 | 1 | 43 | 0.000 | 0.000 | 2 | 1 | 43 | 0.000 | 0.000 | 2 | 1 | 43 | 0.000 | 0.000 |
| 2 | 1 | 44 | -0.002 | -0.003 | 2 | 1 | 44 | 0.000 | 0.000 | 2 | 1 | 44 | 0.000 | 0.000 | 2 | 1 | 44 | 0.000 | 0.000 |
| 2 | 1 | 45 | -0.001 | -0.001 | 2 | 1 | 45 | 0.000 | 0.000 | 2 | 1 | 45 | 0.000 | 0.000 | 2 | 1 | 45 | 0.000 | 0.000 |
| 2 | 1 | 46 | -0.004 | 0.004  | 2 | 1 | 46 | 0.000 | 0.000 | 2 | 1 | 46 | 0.000 | 0.000 | 2 | 1 | 46 | 0.000 | 0.000 |
| 2 | 1 | 47 | -0.000 | -0.000 | 2 | 1 | 47 | 0.000 | 0.000 | 2 | 1 | 47 | 0.000 | 0.000 | 2 | 1 | 47 | 0.000 | 0.000 |
| 2 | 1 | 48 | -0.000 | 0.000  | 2 | 1 | 48 | 0.000 | 0.000 | 2 | 1 | 48 | 0.000 | 0.000 | 2 | 1 | 48 | 0.000 | 0.000 |
| 2 | 1 | 49 | 0.003  | -0.000 | 2 | 1 | 49 | 0.000 | 0.000 | 2 | 1 | 49 | 0.000 | 0.000 | 2 | 1 | 49 | 0.000 | 0.000 |

**Table S8:** The XYZ coordinates calculated by DFTLS of [Mn(5azo-sal<sub>2</sub>-323)]<sup>+</sup>

|    |                  |                   |                   |
|----|------------------|-------------------|-------------------|
| Mn | 5.68955858337724 | 5.35463839534209  | 6.39822444495277  |
| O  | 4.59179994866975 | 5.38730443015562  | 7.93568806046120  |
| N  | 4.42414846852885 | 3.99659461986987  | 5.60760572955936  |
| N  | 4.59111782460234 | 6.86866243005620  | 5.54489614304606  |
| N  | 2.63852624304001 | 0.77549249522603  | 11.65009365803513 |
| N  | 2.72961508571529 | 0.77065382800451  | 10.41401834708413 |
| C  | 3.81976203634195 | 3.11946495925321  | 7.78072140770854  |
| C  | 3.33868004926233 | 1.98847753618487  | 8.45902820131686  |
| H  | 3.07173721576034 | 1.09203004788967  | 7.89623276140193  |
| C  | 4.13279267268377 | 4.29460021343967  | 8.51071736641475  |
| C  | 3.80492067651717 | 3.13932602919022  | 6.32752093033040  |
| C  | 5.37801521834017 | 8.11188157967270  | 5.70900675039436  |
| C  | 3.92222862487272 | 4.29202340323575  | 9.91311785514482  |
| H  | 4.14725987204027 | 5.20593240091938  | 10.46373475855660 |
| C  | 3.19174544306592 | 1.98719576492164  | 9.83715669615565  |
| C  | 4.04064415073645 | 4.10788369097932  | 4.19615522718343  |
| H  | 3.38888087871799 | 3.26530367768170  | 3.92743842220272  |
| H  | 4.93488566491210 | 4.05519670438267  | 3.56703340491687  |
| C  | 2.16988986626337 | -0.45151440625186 | 12.22273031030807 |
| C  | 3.47766643976846 | 3.16237937623611  | 10.56443903488459 |
| H  | 3.34142774954014 | 3.16984409292031  | 11.64513592068176 |
| C  | 1.71336762338594 | -1.54693915056525 | 11.47885550029283 |
| H  | 1.69797511254106 | -1.49393227478338 | 10.39123954197258 |
| C  | 3.30678782146035 | 5.42462970067164  | 3.95733918907154  |
| H  | 2.94169986048936 | 5.42414816617942  | 2.92089798750018  |
| H  | 2.41707651109896 | 5.46681040536792  | 4.60432680220425  |
| C  | 2.18323539931954 | -0.50317757765326 | 13.61812372626127 |
| H  | 2.53909247975048 | 0.36579773971690  | 14.17346964949287 |
| C  | 4.14948406799731 | 6.67633507959361  | 4.14593134051059  |
| H  | 5.05297288882166 | 6.62381031868731  | 3.52636647245588  |
| H  | 3.57611008754660 | 7.56025166896167  | 3.82940638930434  |
| C  | 1.27974397484103 | -2.68969726072687 | 12.14314359648939 |
| H  | 0.92112736486580 | -3.54533826895995 | 11.56860462079587 |
| C  | 1.75059883764100 | -1.65308020227004 | 14.27761200264727 |
| H  | 1.76508390170281 | -1.69351522318864 | 15.36776682500680 |
| C  | 1.29889834216505 | -2.74730605901707 | 13.54060544235746 |
| H  | 0.95709724822666 | -3.64795939371794 | 14.05313617615780 |
| H  | 3.14952155243807 | 2.41017595224345  | 5.83339877306293  |
| H  | 3.76285135890260 | 6.93891832095882  | 6.13269902220233  |
| H  | 4.74907086221665 | 9.00006255775273  | 5.55747556861695  |
| H  | 6.15916017820904 | 8.11279392336986  | 4.93768801358447  |
| O  | 6.78731549344514 | 5.38728464298381  | 4.86075930733530  |
| N  | 6.95493887488595 | 3.99656397365370  | 7.18883919192073  |
| N  | 6.78803326206926 | 6.86863507342675  | 7.25155837327495  |

|   |                   |                   |                   |
|---|-------------------|-------------------|-------------------|
| N | 8.74051324101764  | 0.77544563020184  | 1.14634561684524  |
| N | 8.64942040474377  | 0.77060564146414  | 2.38242058136994  |
| C | 7.55930891697273  | 3.11942892213390  | 5.01572111961937  |
| C | 8.04037561794894  | 1.98843610741071  | 4.33741244990310  |
| H | 8.30730223479896  | 1.09198263779627  | 4.90020603399299  |
| C | 7.24630217944714  | 4.29457257500296  | 4.28572816407670  |
| C | 7.57414851564725  | 3.13928456313711  | 6.46892152733326  |
| C | 6.00116284732008  | 8.11187196796844  | 7.08745376855461  |
| C | 7.45686131772990  | 4.29199305468327  | 2.88332694449574  |
| H | 7.23184155636983  | 5.20590563554695  | 2.33271138876884  |
| C | 8.18731111000410  | 1.98715469819479  | 2.95928419265487  |
| C | 7.33844803055036  | 4.10784049790581  | 8.60028951518535  |
| H | 7.99019286736324  | 3.26524503444584  | 8.86900274827163  |
| H | 6.44420698079756  | 4.05517175356259  | 9.22941286479220  |
| C | 9.20922707102596  | -0.45153443237811 | 0.57371446565492  |
| C | 7.90140521382570  | 3.16234308675153  | 2.23200364817172  |
| H | 8.03763930993845  | 3.16980620806201  | 1.15130621137248  |
| C | 9.66580898349978  | -1.54693106766903 | 1.31759415638585  |
| H | 9.68119616037021  | -1.49391950054176 | 2.40520988753055  |
| C | 8.07233467224081  | 5.42456895625283  | 8.83910815077475  |
| H | 8.43742541440309  | 5.42407596740131  | 9.87554839433998  |
| H | 8.96204528116483  | 5.46673174886069  | 8.19211838659774  |
| C | 9.19588030235616  | -0.50320613037530 | -0.82167858939880 |
| H | 8.83997144885222  | 0.36574562306955  | -1.37702819756718 |
| C | 7.22966574982842  | 6.67629340084899  | 8.65052172268458  |
| H | 6.32617739073941  | 6.62378697735862  | 9.27008875251493  |
| H | 7.80306022128532  | 7.56019621312286  | 8.96704806139639  |
| C | 10.09949628761286 | -2.68966793367967 | 0.65331110770540  |
| H | 10.45815967258188 | -3.54528680229902 | 1.22785387219240  |
| C | 9.62857898488040  | -1.65308834566099 | -1.48116176283201 |
| H | 9.61409322377649  | -1.69353012553212 | -2.57131631935600 |
| C | 10.08034462613004 | -2.74728413009968 | -0.74415048998996 |
| H | 10.42219503988105 | -3.64792100033413 | -1.25667726578234 |
| H | 8.22953244638517  | 2.41011946116547  | 6.96304170135880  |
| H | 7.61630038542962  | 6.93887536943201  | 6.66375454157931  |
| H | 6.63012641233834  | 9.00003868648525  | 7.23898902074456  |
| H | 5.22001806396490  | 8.11279766830895  | 7.85877268479897  |

### HS of [Mn(5azo-sal<sub>2</sub>-323)]<sup>+</sup>

|    |                  |                  |                   |
|----|------------------|------------------|-------------------|
| Mn | 5.68955974926262 | 5.20194196453756 | 6.39822480462501  |
| O  | 4.83022532822679 | 5.19187271074595 | 8.05649063291204  |
| N  | 4.11129704644934 | 3.98487851570616 | 5.68092565729337  |
| N  | 4.48438780371156 | 6.91735227769713 | 5.62431143587849  |
| N  | 2.60160011067857 | 0.68492677333747 | 11.75511642378308 |
| N  | 2.55693066605658 | 0.74536881030264 | 10.51850602994032 |
| C  | 3.68032192573483 | 3.07734619841429 | 7.88313164500706  |

|   |                  |                   |                   |
|---|------------------|-------------------|-------------------|
| C | 3.11061799098825 | 1.99160068132387  | 8.56520579772447  |
| H | 2.60232971850711 | 1.20645548284959  | 8.00252273936137  |
| C | 4.30460649807927 | 4.11370596557206  | 8.62130925124845  |
| C | 3.47613214189149 | 3.18240712785837  | 6.44382952200323  |
| C | 5.32782122399314 | 8.12077043207596  | 5.73180334429969  |
| C | 4.33275689511708 | 4.01458351458029  | 10.03250440444089 |
| H | 4.80401139860104 | 4.82399887953132  | 10.59078330463090 |
| C | 3.16919346936753 | 1.89790344045759  | 9.94736639393316  |
| C | 3.63532861378685 | 4.17400820582843  | 4.30845505500463  |
| H | 2.90221212472890 | 3.39244959884904  | 4.06163471647147  |
| H | 4.48320091758493 | 4.07531182563740  | 3.62097448239782  |
| C | 1.97461590887105 | -0.47131209310077 | 12.32369971761064 |
| C | 3.78639792193679 | 2.92822667521757  | 10.68379018346583 |
| H | 3.82315052081037 | 2.86476437560886  | 11.77055749985893 |
| C | 1.32181902706511 | -1.46280441663227 | 11.58010228620619 |
| H | 1.27171444889013 | -1.38135487892707 | 10.49535423577239 |
| C | 2.98999703297721 | 5.55047726109820  | 4.15283246039903  |
| H | 2.52901146447237 | 5.58868477796527  | 3.15583700727964  |
| H | 2.16852658914930 | 5.64722696027095  | 4.88010972195526  |
| C | 2.04248584318165 | -0.56307653535161 | 13.71528356004801 |
| H | 2.55524158262530 | 0.22392703311029  | 14.27009531661648 |
| C | 3.92878962169424 | 6.74380636637160  | 4.26753980941148  |
| H | 4.77581290226855 | 6.62517824254383  | 3.57952964305508  |
| H | 3.38920483916700 | 7.65777550876629  | 3.97219863211057  |
| C | 0.74270108355796 | -2.54075067995315 | 12.24129401977294 |
| H | 0.23198762526161 | -3.31561500066650 | 11.66721408552080 |
| C | 1.46051379981484 | -1.64695228577387 | 14.37185035942096 |
| H | 1.51436377758359 | -1.71794196790480 | 15.45916208243629 |
| C | 0.81013002356682 | -2.63629181753602 | 13.63535025419299 |
| H | 0.35234708920519 | -3.48535030713116 | 14.14548068133336 |
| H | 2.68273380337195 | 2.55284281389119  | 6.01667154871095  |
| H | 3.71018216121747 | 7.01016343869642  | 6.27734857199630  |
| H | 4.73211399870290 | 9.03886082138655  | 5.61767206275230  |
| H | 6.05586869728592 | 8.09266187379524  | 4.90910448238261  |
| O | 6.54889340659531 | 5.19184181889812  | 4.73995878390852  |
| N | 7.26778435006295 | 3.98483135824645  | 7.11552602789010  |
| N | 6.89478637712174 | 6.91731702128360  | 7.17213303922984  |
| N | 8.77732725985298 | 0.68479134580353  | 1.04134606183750  |
| N | 8.82200794413524 | 0.74523885976750  | 2.27795571215978  |
| C | 7.69873144893526 | 3.07728043411499  | 4.91332247374462  |
| C | 8.26840030008964 | 1.99151505338384  | 4.23125068773131  |
| H | 8.77665993135632 | 1.20635287315064  | 4.79393587878054  |
| C | 7.07448059967440 | 4.11365853088241  | 4.17514238344153  |
| C | 7.90292446917440 | 3.18233841694475  | 6.35262418128907  |
| C | 6.05139139165344 | 8.12076159044222  | 7.06463712489476  |
| C | 7.04631868028386 | 4.01452951217299  | 2.76394795200570  |

|   |                   |                   |                   |
|---|-------------------|-------------------|-------------------|
| H | 6.57508233347419  | 4.82395432741401  | 2.20566748266362  |
| C | 8.20981318828787  | 1.89781170275323  | 2.84909098030346  |
| C | 7.74375936909111  | 4.17395005946420  | 8.48799606117925  |
| H | 8.47685079345150  | 3.39236861945077  | 8.73481866331669  |
| H | 6.89588412010884  | 4.07528300389785  | 9.17547702654438  |
| C | 9.40446700279717  | -0.47135774010133 | 0.47275159588870  |
| C | 7.59263911997610  | 2.92815160091291  | 2.11266504298737  |
| H | 7.55586964949567  | 2.86467993318728  | 1.02589884155329  |
| C | 10.05738925067416 | -1.46277451507534 | 1.21633967572344  |
| H | 10.10749299060102 | -1.38132333849140 | 2.30108767825243  |
| C | 8.38913507036033  | 5.55039897087898  | 8.64361444864578  |
| H | 8.85012250564299  | 5.58859442934816  | 9.64060955420994  |
| H | 9.21060802868201  | 5.64712053100973  | 7.91633630921764  |
| C | 9.33658298381028  | -0.56313282143717 | -0.91883077381536 |
| H | 8.82372100744539  | 0.22380716282055  | -1.47363452543871 |
| C | 7.45038030550837  | 6.74375757326427  | 8.52890463594101  |
| H | 6.60335401128711  | 6.62515829475175  | 9.21691604014872  |
| H | 7.98999434256480  | 7.65771043921229  | 8.82424271833469  |
| C | 10.63662134119087 | -2.54065437347637 | 0.55513973689931  |
| H | 11.14743046703162 | -3.31546094645098 | 1.12921252728054  |
| C | 9.91866803077483  | -1.64694293977562 | -1.57540566731958 |
| H | 9.86480537824345  | -1.71794192958053 | -2.66271615920729 |
| C | 10.56918147883341 | -2.63620447391494 | -0.83891536586721 |
| H | 11.02705300354559 | -3.48521135277017 | -1.34905216562114 |
| H | 8.69630338813388  | 2.55275067662091  | 6.77978368194723  |
| H | 7.66899448152766  | 7.01010080897333  | 6.51909474304894  |
| H | 6.64712761126466  | 9.03883361931247  | 7.17876477972578  |
| H | 5.32334320181581  | 8.09267929165971  | 7.88733626327876  |

### LS of [Mn(5azo-sal<sub>2</sub>-323)]Cl

|    |                  |                  |                   |
|----|------------------|------------------|-------------------|
| Mn | 5.68807112186435 | 5.35423504018891 | 6.38992958528722  |
| O  | 4.62642268868948 | 5.37572260151204 | 7.95089856547184  |
| N  | 4.41638034153018 | 3.99378630193642 | 5.61528178603564  |
| N  | 4.59095393110758 | 6.86091072767397 | 5.54263590423537  |
| N  | 2.62075497942553 | 0.78624749301432 | 11.66362329110467 |
| N  | 2.71159677931247 | 0.78170914645426 | 10.42745287754593 |
| C  | 3.82067528775831 | 3.12021196152859 | 7.79305530566618  |
| C  | 3.32770883813194 | 1.99492781151150 | 8.47230418527096  |
| H  | 3.04440663782543 | 1.10363532127524 | 7.90925503722294  |
| C  | 4.15573517591061 | 4.28928066531976 | 8.52356416314913  |
| C  | 3.79789480207606 | 3.14041560299933 | 6.34021359306086  |
| C  | 5.37904103047363 | 8.10330627568048 | 5.68967208875508  |
| C  | 3.95384370445723 | 4.28562554910356 | 9.92799773092091  |
| H  | 4.19567340572702 | 5.19497173453116 | 10.47906666357586 |
| C  | 3.18842342381291 | 1.99229736465734 | 9.85121783851566  |
| C  | 4.02711547099728 | 4.10036155957904 | 4.20521915183945  |



|   |                  |                   |                   |
|---|------------------|-------------------|-------------------|
| H | 3.37318967283735 | 3.25742512958973  | 3.94247837392790  |
| H | 4.91872923573708 | 4.04395401357979  | 3.57266176234295  |
| C | 2.13742872534566 | -0.43578246547876 | 12.23466597210700 |
| C | 3.49657544451901 | 3.16155862370374  | 10.57950298826874 |
| H | 3.36732645637527 | 3.16852311891134  | 11.66107117312713 |
| C | 1.66961518579156 | -1.52558132236166 | 11.48951712656865 |
| H | 1.65638832549193 | -1.47175263999472 | 10.40191445230102 |
| C | 3.29420021792425 | 5.41720122547433  | 3.96654799421164  |
| H | 2.92294470157554 | 5.41348126139528  | 2.93214120940596  |
| H | 2.41038547058869 | 5.46387113202754  | 4.62020483449379  |
| C | 2.14840726987428 | -0.48870811632117 | 13.62999394882570 |
| H | 2.51322626627008 | 0.37580587449782  | 14.18648390498686 |
| C | 4.14035136739843 | 6.66798173513543  | 4.14846793771159  |
| H | 5.03405750067690 | 6.61837222111829  | 3.51401548724796  |
| H | 3.55923488476912 | 7.55068572412148  | 3.84046318326478  |
| C | 1.22250818830038 | -2.66392239606111 | 12.15237771471299 |
| H | 0.85513259058985 | -3.51508770461878 | 11.57673401991202 |
| C | 1.70217368968092 | -1.63418511627510 | 14.28811258938092 |
| H | 1.71485680842338 | -1.67562518810942 | 15.37824238748909 |
| C | 1.23926802868949 | -2.72280428928634 | 13.54981595411077 |
| H | 0.88689712210305 | -3.61995117142430 | 14.06131335593067 |
| H | 3.13705990718461 | 2.41305883449294  | 5.85059563503524  |
| H | 3.74658983111857 | 6.97180967281679  | 6.11912439095428  |
| H | 4.74339690794156 | 8.98860923326763  | 5.54433251008420  |
| H | 6.15413600523202 | 8.10966045600025  | 4.91173432466998  |
| O | 6.77510311588428 | 5.37989328686629  | 4.84059261242744  |
| N | 6.96961056402271 | 3.99665441655669  | 7.17146417824722  |
| N | 6.79912223629088 | 6.86827680860998  | 7.22682551808134  |
| N | 8.75605060881807 | 0.77815149447144  | 1.12703526309315  |
| N | 8.65809262378895 | 0.77195328759747  | 2.36261154281932  |
| C | 7.56100835478656 | 3.11672704886901  | 4.99628333517682  |
| C | 8.04606685992653 | 1.98802131350373  | 4.31732903536109  |
| H | 8.32292689349842 | 1.09473876109714  | 4.88043236506051  |
| C | 7.23609858459459 | 4.28891392865275  | 4.26626713784274  |
| C | 7.58651771307441 | 3.14004164740079  | 6.44932004092620  |
| C | 6.01263996729896 | 8.11161169561104  | 7.06333217434783  |
| C | 7.43796178703065 | 4.28385050768129  | 2.86205725583871  |
| H | 7.20275186888279 | 5.19484584570486  | 2.31084008481404  |
| C | 8.18689291651601 | 1.98504357914861  | 2.93849724415800  |
| C | 7.36502329091142 | 4.11217735578212  | 8.57903743883516  |
| H | 8.02103809920049 | 3.27181487138953  | 8.84484674965083  |
| H | 6.47670872099251 | 4.06022525450356  | 9.21648044512372  |
| C | 9.23543946494744 | -0.44568443002359 | 0.55649616251765  |
| C | 7.88732199185046 | 3.15647920936044  | 2.21040551597670  |
| H | 8.01705837846468 | 3.16272554389842  | 1.12888967554634  |
| C | 9.69211644734104 | -1.53975242679458 | 1.30231185571250  |

|    |                   |                   |                   |
|----|-------------------|-------------------|-------------------|
| H  | 9.69847189444726  | -1.48836540481820 | 2.39009012912696  |
| C  | 8.09937581749756  | 5.43070193679415  | 8.80711718555028  |
| H  | 8.47401258070864  | 5.43404601485962  | 9.84017874362489  |
| H  | 8.98320232490057  | 5.47114013138032  | 8.15187031478888  |
| C  | 9.23340186467697  | -0.49547475321276 | -0.83898171704499 |
| H  | 8.87715465171813  | 0.37231076809553  | -1.39592764603595 |
| C  | 7.25479829075654  | 6.68168525221530  | 8.62149073955938  |
| H  | 6.35782530281496  | 6.63189083848287  | 9.25056700797135  |
| H  | 7.83191606786992  | 7.56653923628075  | 8.92883074785224  |
| C  | 10.13738911354271 | -2.67905911903545 | 0.63989288699581  |
| H  | 10.49620318828122 | -3.53352332749340 | 1.21604802562164  |
| C  | 9.67771136472119  | -1.64194381225403 | -1.49668173004055 |
| H  | 9.67214735973110  | -1.68089607225398 | -2.58696204582016 |
| C  | 10.12976902919353 | -2.73468838572380 | -0.75776165917124 |
| H  | 10.48076078708132 | -3.63256976287943 | -1.26891985265882 |
| H  | 8.24923337695798  | 2.41479836976421  | 6.93975915969709  |
| H  | 7.62102313902535  | 6.93331079783202  | 6.62966208891851  |
| H  | 6.64381795185134  | 8.99951978049266  | 7.20809143818056  |
| H  | 5.23569322397134  | 8.11493665938166  | 7.83870344045275  |
| Cl | 1.76060175859084  | 7.73032884903764  | 6.95204811214366  |

### HS of [Mn(5azo-sal<sub>2</sub>-323)]Cl

|    |                  |                   |                   |
|----|------------------|-------------------|-------------------|
| Mn | 5.73890144921374 | 5.19910160471390  | 6.36819176675263  |
| O  | 4.89021871047151 | 5.15281623911997  | 8.03803006570989  |
| N  | 4.14724118008924 | 3.91528524386280  | 5.65712863032791  |
| N  | 4.50063016131192 | 6.82505388548099  | 5.63647594007766  |
| N  | 2.56744188756856 | 0.72396055537998  | 11.77130874731894 |
| N  | 2.51633298323164 | 0.77985510199955  | 10.53447362431266 |
| C  | 3.69211229017280 | 3.06000016798104  | 7.87523556257960  |
| C  | 3.09849977915398 | 1.99570254622365  | 8.56983057611787  |
| H  | 2.57224494503389 | 1.21666116430186  | 8.01502479247048  |
| C  | 4.34065555610987 | 4.08973968351402  | 8.60371281313968  |
| C  | 3.49439655942839 | 3.14099251140388  | 6.43123887793215  |
| C  | 5.26424235953757 | 8.08024689153557  | 5.77090103849521  |
| C  | 4.36759165847951 | 4.00001726794533  | 10.01666719535301 |
| H  | 4.85788094031044 | 4.80378835792705  | 10.56682576031297 |
| C  | 3.15473752121137 | 1.91215700524870  | 9.95330346690737  |
| C  | 3.68318378363009 | 4.08509357701027  | 4.28044335618722  |
| H  | 2.95100643127441 | 3.30255265248522  | 4.03114699753969  |
| H  | 4.53721993735394 | 3.98125893493589  | 3.60080999049155  |
| C  | 1.91364152976804 | -0.41265788266244 | 12.34921539260314 |
| C  | 3.79688713768938 | 2.93383652935033  | 10.67979000598211 |
| H  | 3.83329238274546 | 2.88028256350843  | 11.76712397774070 |
| C  | 1.22924989713919 | -1.38941508160970 | 11.61462644870446 |
| H  | 1.17399616610816 | -1.31123704916024 | 10.52989623430587 |
| C  | 3.03938422396428 | 5.46083229281190  | 4.11430427946961  |

|   |                   |                   |                   |
|---|-------------------|-------------------|-------------------|
| H | 2.60851607266584  | 5.50754778500799  | 3.10405925618066  |
| H | 2.19910017479592  | 5.54903714329895  | 4.81930532982092  |
| C | 1.98866554742995  | -0.50065695376986 | 13.74069590853219 |
| H | 2.52632094929962  | 0.27446595151299  | 14.28863109576009 |
| C | 3.96501577294838  | 6.66136311221860  | 4.26828616781546  |
| H | 4.81808934807594  | 6.57619824019771  | 3.58280763612851  |
| H | 3.41016271729552  | 7.57243303654356  | 3.99236529041071  |
| C | 0.62574695468604  | -2.44851670875651 | 12.28445670389207 |
| H | 0.09037655530129  | -3.21167102715608 | 11.71720508664603 |
| C | 1.38222112202446  | -1.56563413459406 | 14.40596872710285 |
| H | 1.44183371861874  | -1.63348614811824 | 15.49318229220500 |
| C | 0.70016487291262  | -2.54009710444462 | 13.67837368144158 |
| H | 0.22317562544027  | -3.37429403554166 | 14.19536029338039 |
| H | 2.69173026403804  | 2.51373647031288  | 6.01582607505637  |
| H | 3.69931681402570  | 6.88426924907481  | 6.27577417856190  |
| H | 4.59847717366963  | 8.95161622491930  | 5.67681803955140  |
| H | 5.99226815065236  | 8.12722246074740  | 4.94856698992726  |
| O | 6.59276609064423  | 5.21400076253555  | 4.70371553682004  |
| N | 7.30185519746144  | 4.01682308162778  | 7.06993293903049  |
| N | 6.90739893972655  | 6.96460157390572  | 7.18570426366163  |
| N | 8.80897668395046  | 0.71047220757310  | 0.99790693938153  |
| N | 8.85827315159960  | 0.76987308808101  | 2.23441982324196  |
| C | 7.73837392339123  | 3.10107272495797  | 4.87142574469120  |
| C | 8.30786885768255  | 2.01431071500621  | 4.18987915397593  |
| H | 8.81029731313188  | 1.22561981796984  | 4.75281207154342  |
| C | 7.12056033241587  | 4.14187757050551  | 4.13429235389498  |
| C | 7.93736996493962  | 3.21053602316503  | 6.30898416200786  |
| C | 5.98620579725340  | 8.10853556892545  | 7.10515261518109  |
| C | 7.10113635144360  | 4.04913958505358  | 2.72206786274475  |
| H | 6.63567232372228  | 4.86201370300594  | 2.16407723314869  |
| C | 8.25336317308790  | 1.92504080930424  | 2.80771430553864  |
| C | 7.77811642514874  | 4.20872364556953  | 8.44421827629947  |
| H | 8.51456970787719  | 3.42845436394348  | 8.68343444699394  |
| H | 6.93189791160677  | 4.10101270246251  | 9.13167634708749  |
| C | 9.42600615526730  | -0.44931638057875 | 0.42606681681194  |
| C | 7.64511747590733  | 2.96184415909842  | 2.07147220483706  |
| H | 7.61336946623874  | 2.90109333718147  | 0.98438726408811  |
| C | 10.07391315636049 | -1.44649865831962 | 1.16622977361741  |
| H | 10.12882406130299 | -1.36641932268546 | 2.25085404628183  |
| C | 8.42040515854334  | 5.58575229539819  | 8.61186647990650  |
| H | 8.89712387852265  | 5.60578907964028  | 9.60201482973089  |
| H | 9.23048629778500  | 5.69807507190199  | 7.87410933253657  |
| C | 9.35183062457846  | -0.53927999114415 | -0.96529270610077 |
| H | 8.84287004224410  | 0.25217476070715  | -1.51724936159574 |
| C | 7.47447811729367  | 6.77666271380560  | 8.53230844976388  |
| H | 6.63499865332550  | 6.63444264170977  | 9.22519858444660  |

|    |                   |                   |                   |
|----|-------------------|-------------------|-------------------|
| H  | 8.00951552141744  | 7.68795626483461  | 8.84547070335733  |
| C  | 10.64160354587977 | -2.52849191167704 | 0.50177424320291  |
| H  | 11.14828196533061 | -3.30800369398255 | 1.07310072590777  |
| C  | 9.92239442269749  | -1.62716799251071 | -1.62511031863642 |
| H  | 9.86344472048871  | -1.69682120494595 | -2.71223188663069 |
| C  | 10.56771077040177 | -2.62231598904296 | -0.89204276208776 |
| H  | 11.01641176541200 | -3.47467146340725 | -1.40470607141420 |
| H  | 8.72866516583377  | 2.58357229964469  | 6.74235167145209  |
| H  | 7.67101714406571  | 7.11835730936003  | 6.53243345842641  |
| H  | 6.51245677852744  | 9.06651365364723  | 7.23632884545429  |
| H  | 5.26030384115438  | 8.01219355158117  | 7.92435155002868  |
| Cl | 1.76073482145972  | 7.37063320142997  | 7.39988375812588  |

**Table S9.** The structural parameters and energies for the low-spin (LS) and high-spin (HS) states for molecular geometries of **1** calculated by  $\omega$ B97M-D4.

| Structural parameters                                           | [Mn(5azo-sal <sub>2</sub> -323)] <sup>+</sup> of <b>1</b> |                 |       | [Mn(5azo-sal <sub>2</sub> -323)]Cl of <b>1</b> |                 |       |
|-----------------------------------------------------------------|-----------------------------------------------------------|-----------------|-------|------------------------------------------------|-----------------|-------|
|                                                                 | LS                                                        | MECP            | HS    | LS                                             | MECP            | HS    |
| Mn-N <sub>amine</sub> <sup>a</sup>                              | 2.056                                                     | 2.141           | 2.235 | 2.047                                          | 2.121           | 2.171 |
| Mn-N <sub>amine</sub>                                           | 2.056                                                     | 2.141           | 2.235 | 2.056                                          | 2.156           | 2.270 |
| Mn-N <sub>imine</sub>                                           | 2.018                                                     | 2.084           | 2.118 | 2.017                                          | 2.076           | 2.082 |
| Mn-N <sub>imine</sub>                                           | 2.018                                                     | 2.084           | 2.118 | 2.024                                          | 2.098           | 2.165 |
| Mn-O                                                            | 1.889                                                     | 1.877           | 1.868 | 1.888                                          | 1.877           | 1.871 |
| Mn-O                                                            | 1.889                                                     | 1.877           | 1.868 | 1.893                                          | 1.879           | 1.874 |
| N <sub>amine</sub> -H                                           |                                                           |                 |       | 1.028                                          | 1.027           | 1.027 |
| Cl...H                                                          |                                                           |                 |       | 2.283                                          | 2.291           | 2.293 |
| Spin transition energetics between the LS and HS states (LS↔HS) |                                                           |                 |       |                                                |                 |       |
| $\Delta E_{cl}$                                                 |                                                           | 1.381 kcal/mol  |       |                                                | 1.684 kcal/mol  |       |
| $\Delta E_{cl+ZPE}$                                             |                                                           | -0.522 kcal/mol |       |                                                | -0.105 kcal/mol |       |

<sup>a</sup> nitrogen atom involved in N-H...Cl hydrogen bond.

## References

1. M. Tripathi, C. G. Giri, D. Das, R. Pande, S. Sarkar, S. Giri, G. Roymahapatra and A. Sarkar, *Nucleosides Nucleotides Nucleic Acids*, 2018, **37**, 563-584.
2. T. Degen, M. Sadki, E. Bron, U. König and G. Nénert, *Powder Diffraction*, 2014, **29**, S13-S18.
3. G. M. Sheldrick, SADABS Version 2.03, Bruker Analytical X-Ray Systems, Madison, WI, USA, 2000.
4. Farrugia, L. WinGX and ORTEP for Windows: an update. *J. Appl. Crystallogr.* 2012, **45**, 849-854.
5. O. V. Dolomanov, L. J. Bourhis, R. J. Gildea, J. A. K. Howard and H. Puschmann, *J. Appl. Crystallogr.*, 2009, **42**, 339-341.
6. C. F. Macrae, P. R. Edgington, P. McCabe, E. Pidcock, G. P. Shields, R. Taylor, M. Towler and J. van de Streek, *J. Appl. Crystallogr.*, 2006, **39**, 453-457.
7. R. Ketkaew, Y. Tantirungrotechai, P. Harding, G. Chastanet, P. Guionneau, M. Marchivie and D. J. Harding, *Dalton Trans.*, 2021, **50**, 1086-1096.
